# Supplementary material for: ‘Obesity’ is healthy for cetaceans? Evidence from pervasive positive selection in genes related to triacylglycerol metabolism
Source: PubMed Central journal article supplement (PMC4585638; doi:10.1038/srep14187), 2015-09-18

**Obesity is healthy for cetaceans: Evidence from pervasive positive  
selection in genes related to triacylglycerol metabolism**

Zhengfei Wang<sup>1</sup>, Zhuo Chen<sup>1,2</sup>, Shixia Xu<sup>1</sup>, Wenhua Ren<sup>1</sup>,

Kaiya Zhou<sup>1</sup> and Guang Yang<sup>1\*</sup>

**Supplementary Table S1.** The 88 genes of TAG metabolism Analyzed in this Study.

| Synthesis |              | Lipolysis | Regulation |
|-----------|--------------|-----------|------------|
| ACC1*     | FABP5        | AdPLA*    | ABHD5      |
| ACSL1*    | FABP6*       | ATGL*     | ADIPOQ*    |
| ACSL3     | FABP7        | HSL*      | ADRP*      |
| ACSL4*    | GOT2(FABPpm) | LIPH      | AMPK       |
| ACSL5*    | FAS*         | LPL*      | CAV1       |
| ACSL6*    | CD36(FAT)    | MGLL*     | CIDEA      |
| ACSS1     | FATP1*       | PNLIP*    | LXRa       |
| ACSS2     | FATP2*       |           | LXRb       |
| ACSS3     | FATP3*       |           | MLXIPL     |
| AGPAT1*   | FATP4        |           | PDE3B*     |
| AGPAT2    | GNPAT        |           | PLIN1*     |
| AGPAT3*   | GPAT1*       |           | PLIN3      |
| AGPAT4*   | GPAT2*       |           | PLIN4      |
| AGPAT5*   | MOGAT1*      |           | PLIN5      |
| AGPAT6*   | MOGAT2*      |           | PPARA*     |
| DGAT1*    | MOGAT3*      |           | PPARD*     |
| DGAT2*    | PLCB1        |           | PPARG*     |
| DGKA      | PLCB2        |           | SERTAD2*   |
| DGKB      | PLCB3        |           | SREBF1*    |
| DGKE      | PLCB4        |           | SREBF2*    |
| DGKG      | PLCD3        |           | APOB       |
| DGKH      | PLCD4        |           |            |
| DGKI      | PLCE1        |           |            |
| DGKQ      | PLCG1        |           |            |
| DGKZ      | PLCG2        |           |            |
| FABP1*    | PPAP2A       |           |            |
| FABP2*    | PPAP2B       |           |            |
| FABP3     | PPAP2C       |           |            |
| FABP4*    |              |           |            |

\* Forty-one genes were sequenced for five cetacean species (two mysticetes: common minke whale (*Balaenoptera omurai*), Omura's whale (*Balaenoptera acutorostrata*), and three odontocetes: Beluga (*Delphinapterus leucas*), Finless porpoise (*Neophocaena phocaenoides*), and Long-beaked common dolphin (*Delphinus capensis*)) in this study.

#### Abbreviations:

ACSL: Acyl-CoA Synthetase Long-chain family member; ACSS: Acyl-CoA Synthetase Short-chain family member; ACC1 (also known as ACACA): Acetyl-CoA Carboxylase Alpha  
AGPAT: 1-Acylglycerol-3-Phosphate O-Acyltransferase; DGAT: Diacylglycerol O-Acyltransferase; DGKA: Diacylglycerol Kinase, Alpha; DGKB: Diacylglycerol Kinase, Beta; DGKG: Diacylglycerol Kinase, Gamma; DGKH: Diacylglycerol Kinase, Eta; DGKI: Diacylglycerol Kinase, Iota; DGKQ: Diacylglycerol Kinase, Theta; DGKZ: Diacylglycerol Kinase, Zeta; GNPAT: Glyceronephosphate O-Acyltransferase; GPAT: Glycerol-3-Phosphate

Acyltransferase; MOGAT: Monoacylglycerol O-Acyltransferase; FABP: Fatty Acid Binding Protein; FABPpm(also known as GOT2): Glutamic-Oxaloacetic Transaminase 2; FAS: Fatty Acid Synthase; FAT (also known as CD36): CD36 molecule (thrombospondin receptor); FATP: Solute Carrier Family 27 (Fatty Acid Transporter), member; PLCB: Phospholipase C, Beta; PLCD: Phospholipase C, Delta; PLCE: Phospholipase C, Epsilon; PLCG: Phospholipase C, Gamma; PPAP2A: Phosphatidic Acid Phosphatase type 2A; PPAP2B: Phosphatidic Acid Phosphatase type 2B; PPAP2C: Phosphatidic Acid Phosphatase type 2C; AdPLA: Adipose-Specific Phospholipase A2; ATGL: Adipose Triglyceride Lipase; HSL: Hormone-Sensitive Lipase; LIPH: Lipase, Member H; LPL: Lipoprotein Lipase; MGLL: Monoglyceride Lipase; PNLIP: Pancreatic Lipase ABHD5: Abhydrolase Domain Containing 5; ADIPOQ: Adiponectin, C1Q and collagen domain containing; ADRP (also known as PLIN2): Adipose Differentiation-Related Protein; AMPK: AMP-activated protein kinase; CAV1: Caveolin 1, Caveolae Protein; CIDEA: Cell Death-Inducing DFFA-Like Effector A; LXRA: Liver X Receptor Alpha Protein; LXRB: Liver X Receptor Beta Protein; MLXIPL (also known as ChREBP): Carbohydrate Response Element Binding Protein; PDE3B: Phosphodiesterase 3B; PLIN: Perilipin; PPARA: Peroxisome Proliferator-Activated Receptor Alpha; PPARD: Peroxisome Proliferator-Activated Receptor Delta; PPARG: Peroxisome Proliferator-Activated Receptor Gamma; SERTAD2: SERTA domain-containing Protein 2; SREBF: Sterol Regulatory Element Binding Transcription Factor APOB: Apolipoprotein B.

## **Supplementary Figure Legends**

**Supplementary Figure S1.** A well supported phylogeny of mammals used for selective pressure analysis in PAML. Tree topologies of Laurasiatheria and primates were from Zhou et al. (2012)<sup>52</sup> and Perelman et al. (2011)<sup>53</sup>, respectively. Different orders of mammals were marked with various colors. Branches a–aa in the tree are used in the branch-site models tests, and results are listed in Tables S2 and Tables S4.

**Supplementary Figure S2.** Spatial distribution of positively selected sites in the three-dimensional (3D) structure of 15 genes related to TAG metabolism in cetaceans.

# Supplementary Figure S1

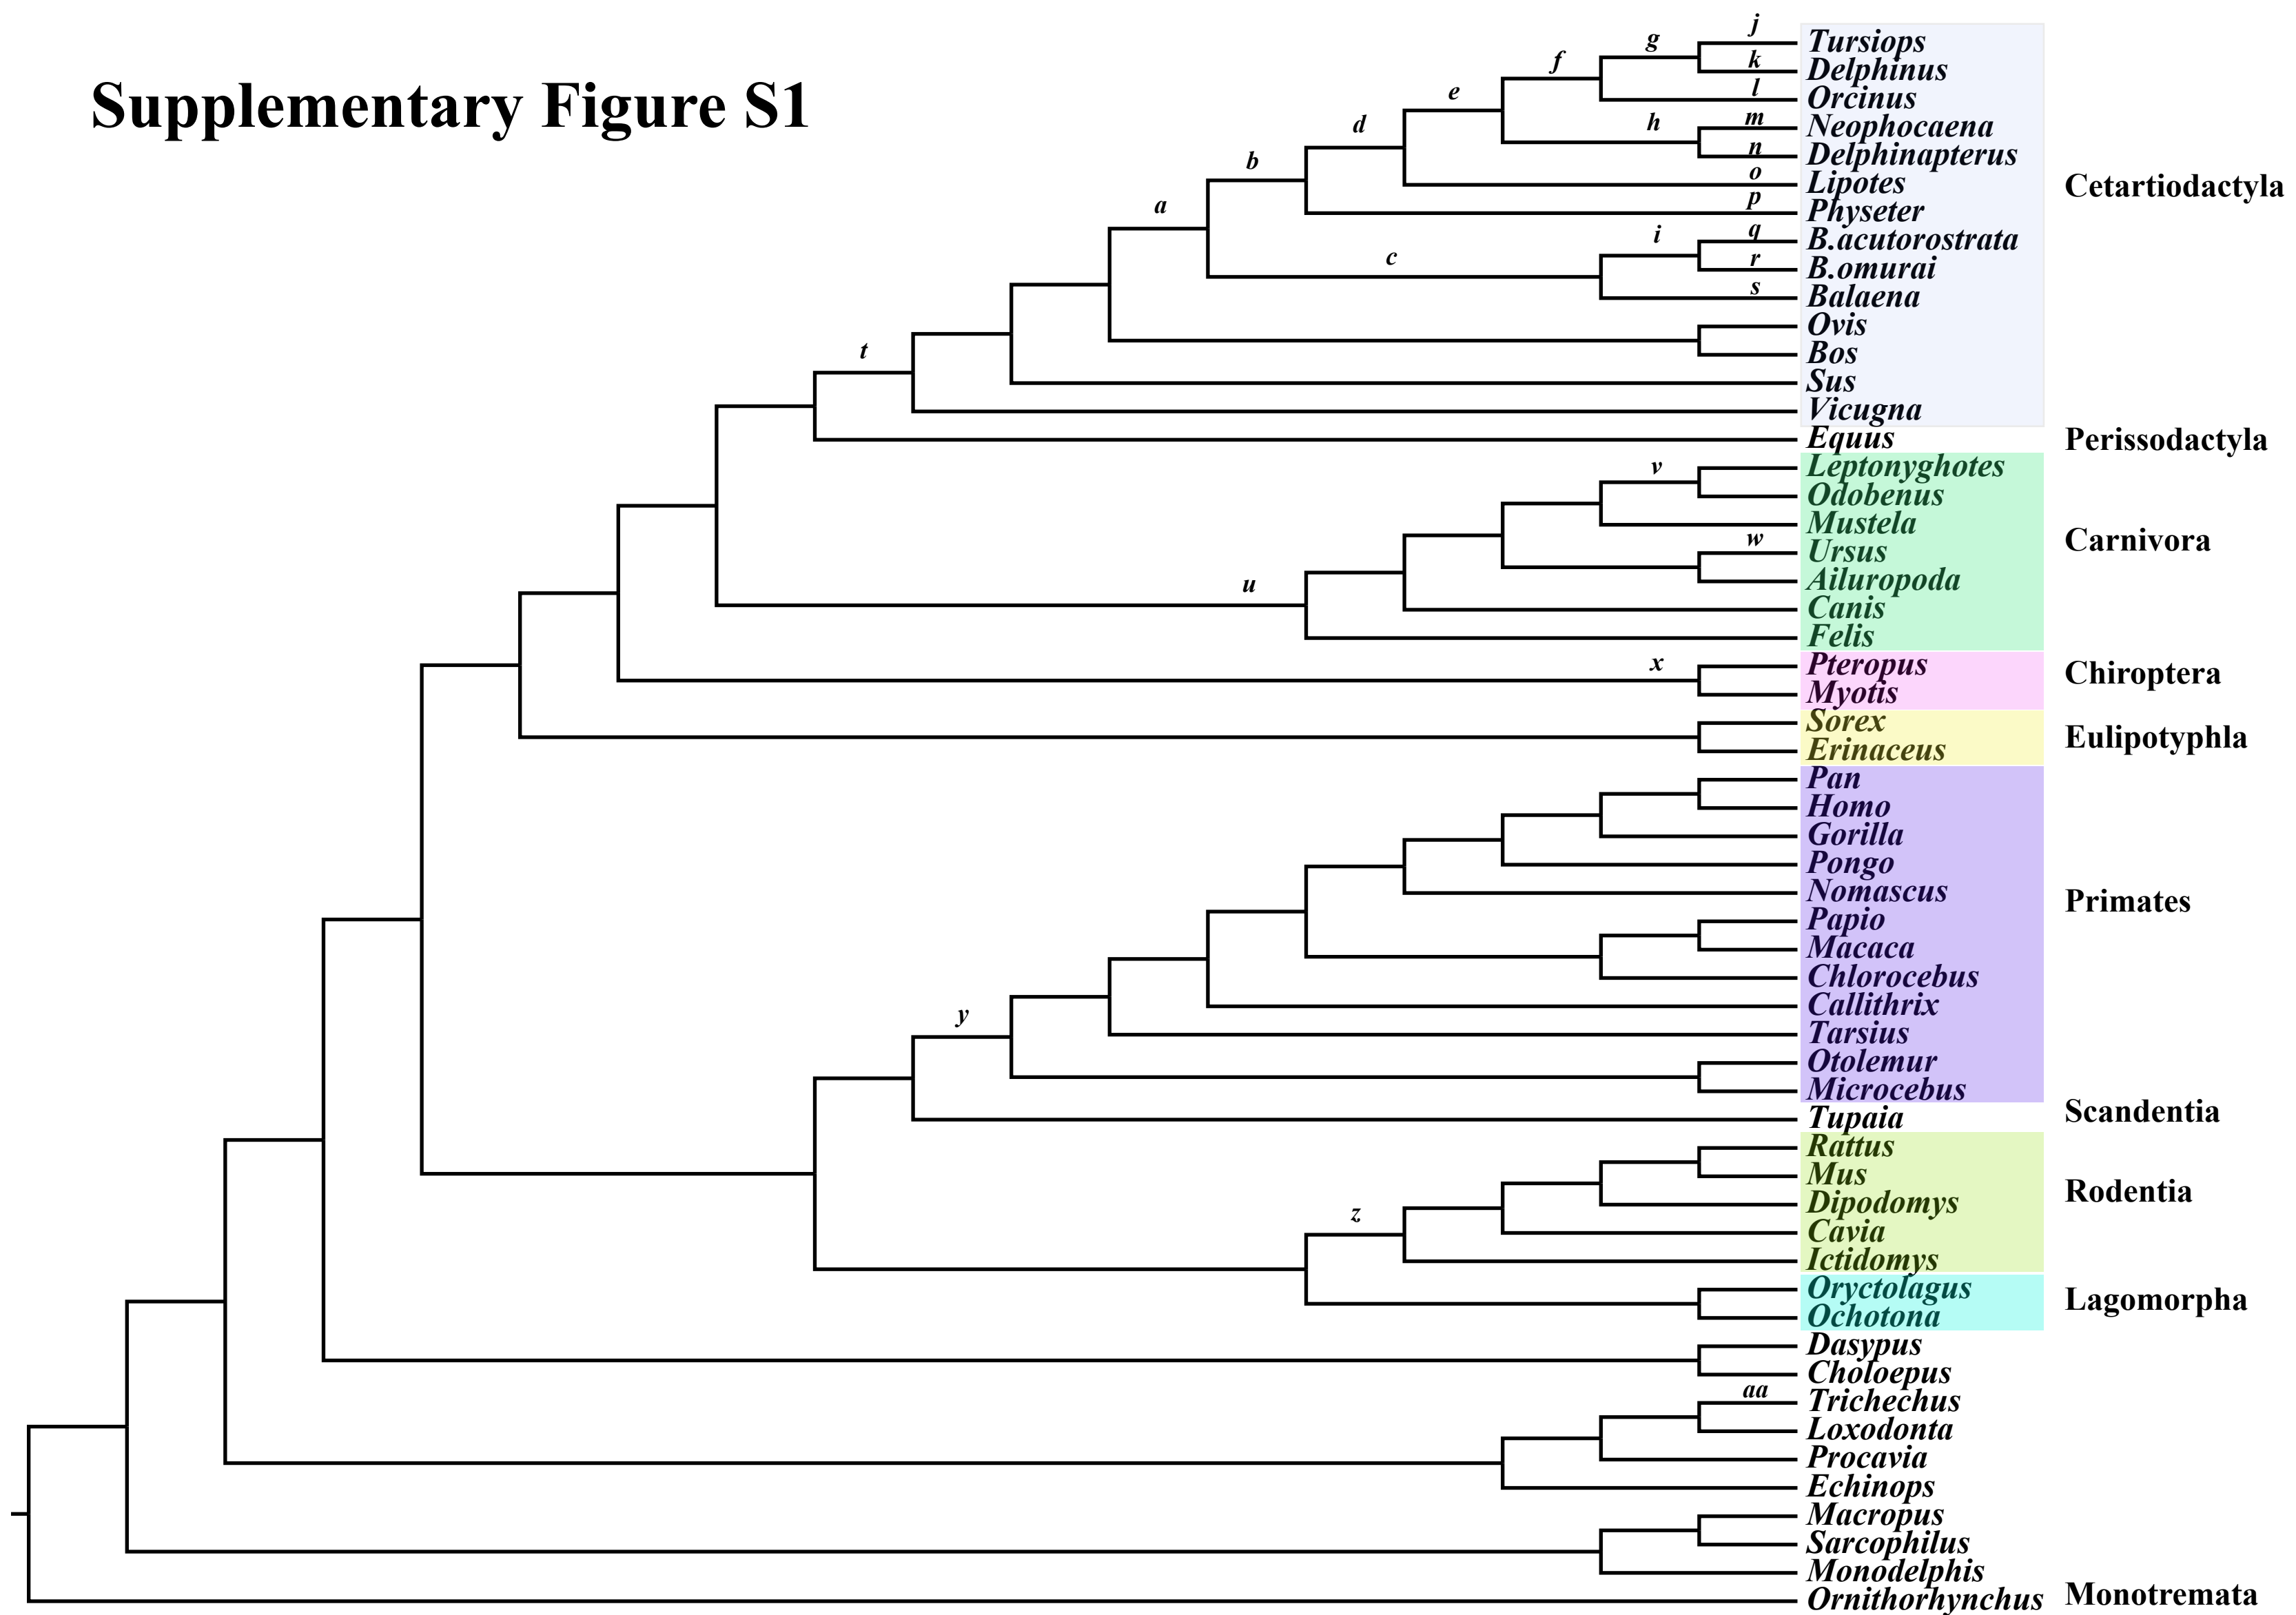

# Supplementary Figure S2

ACSL1

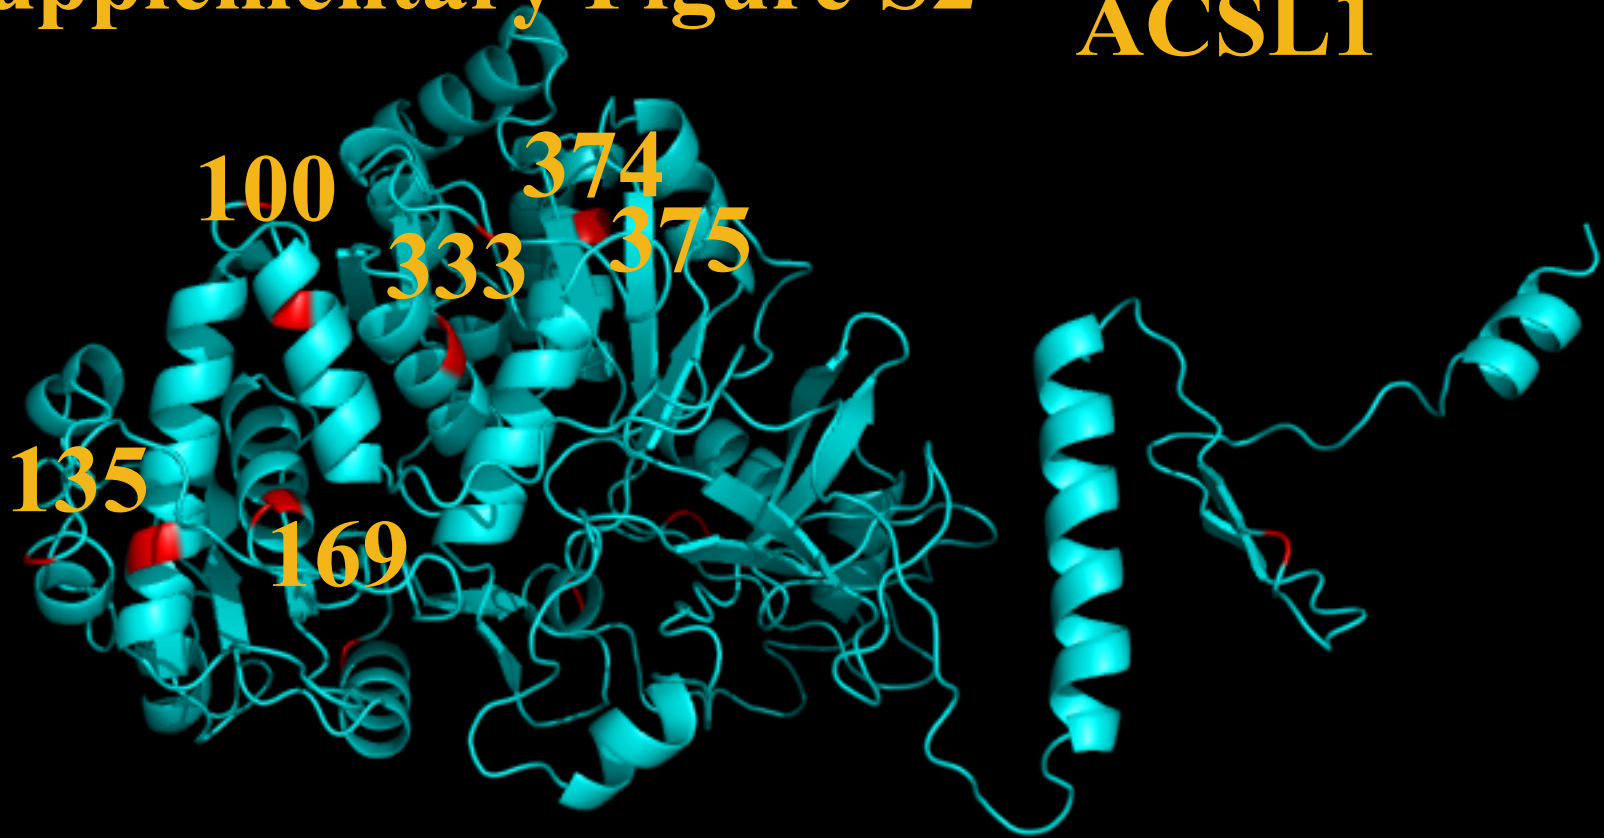

# ACSL6

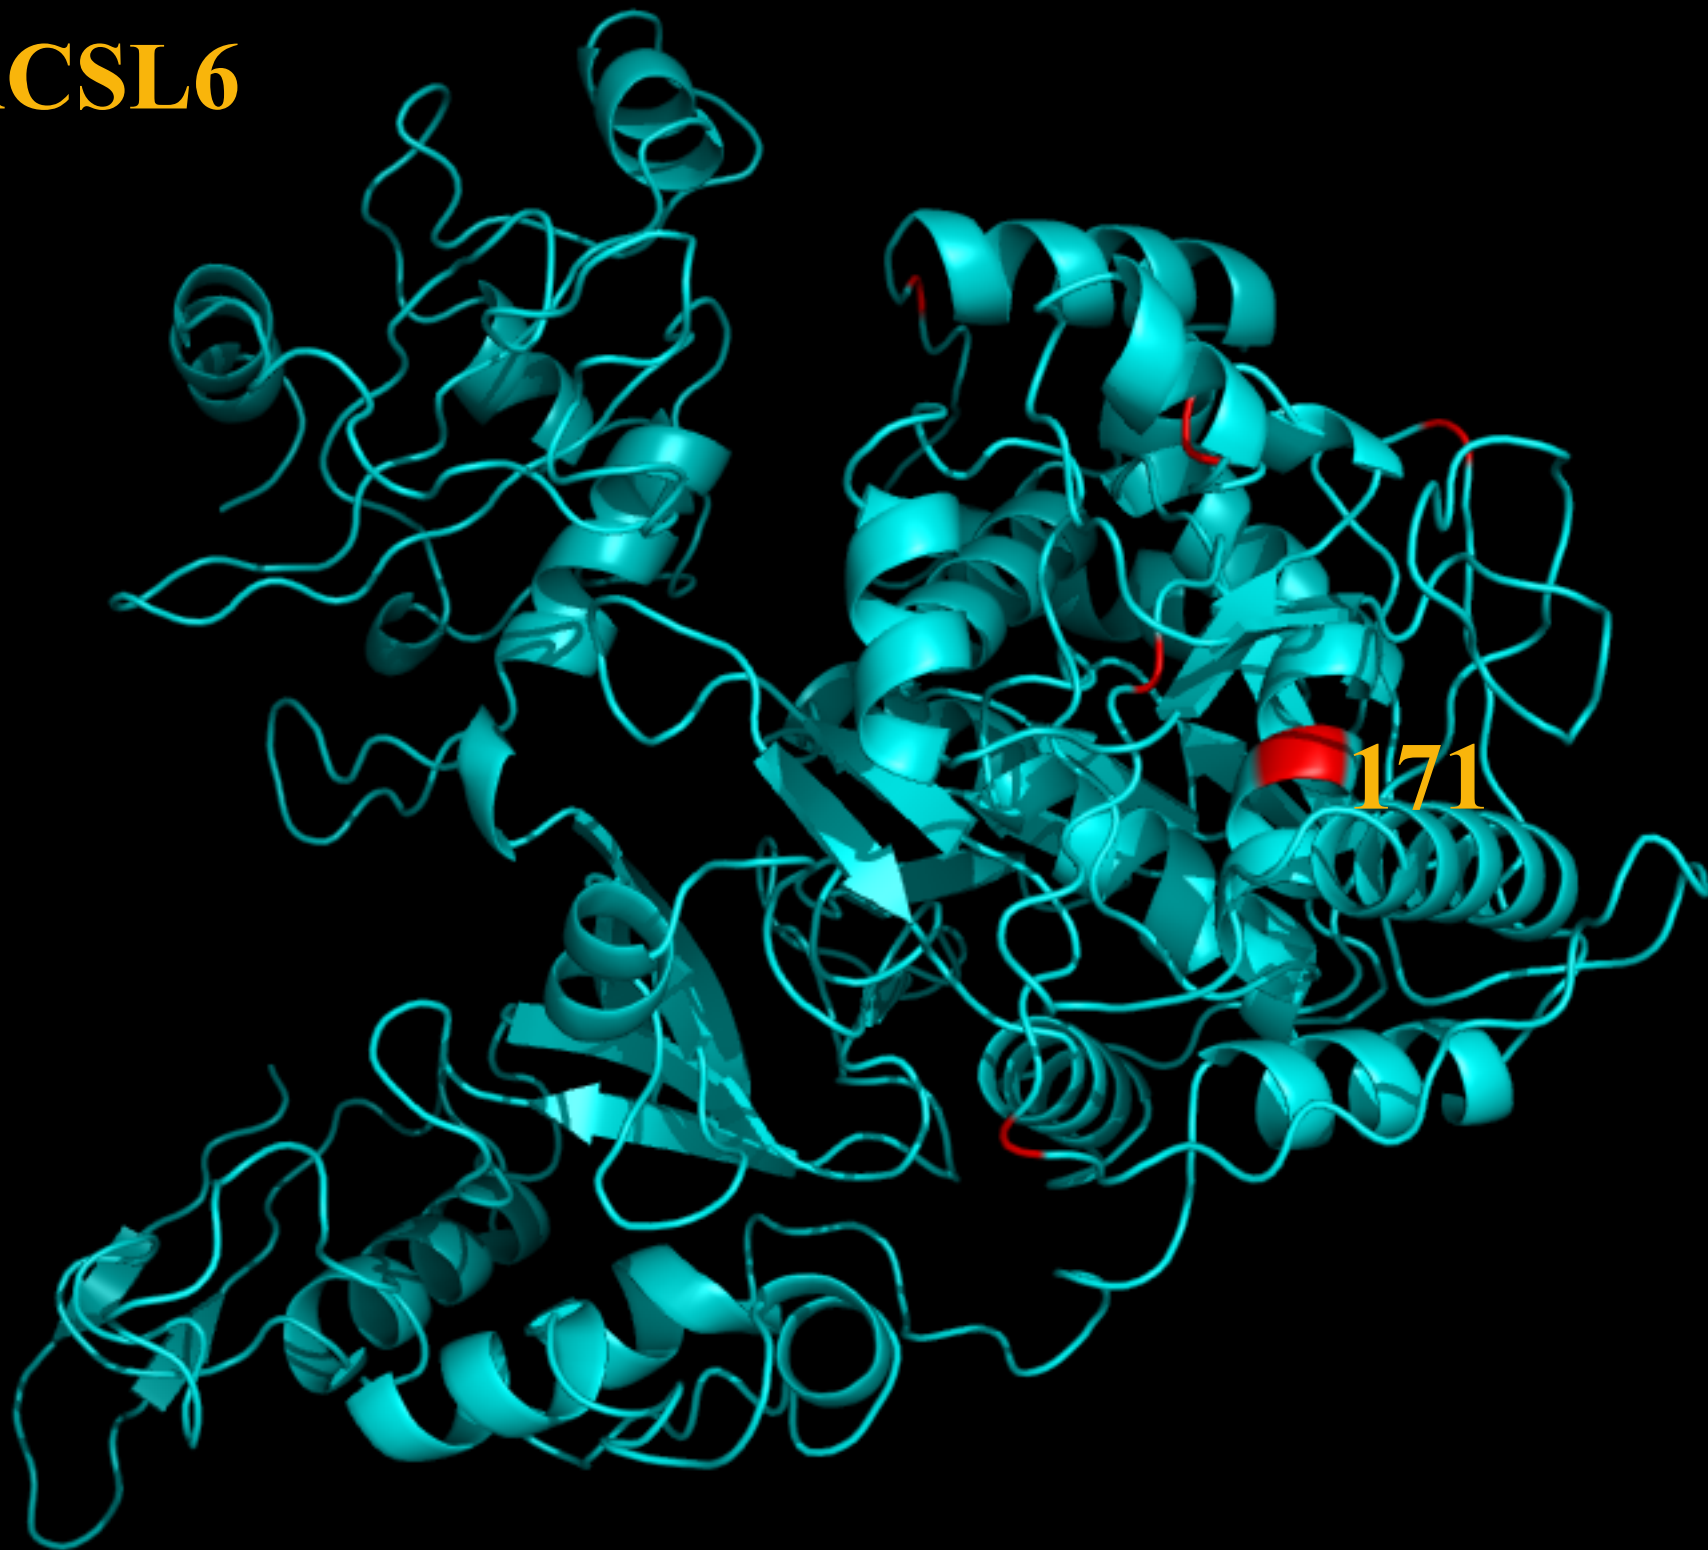

# AGPAT5

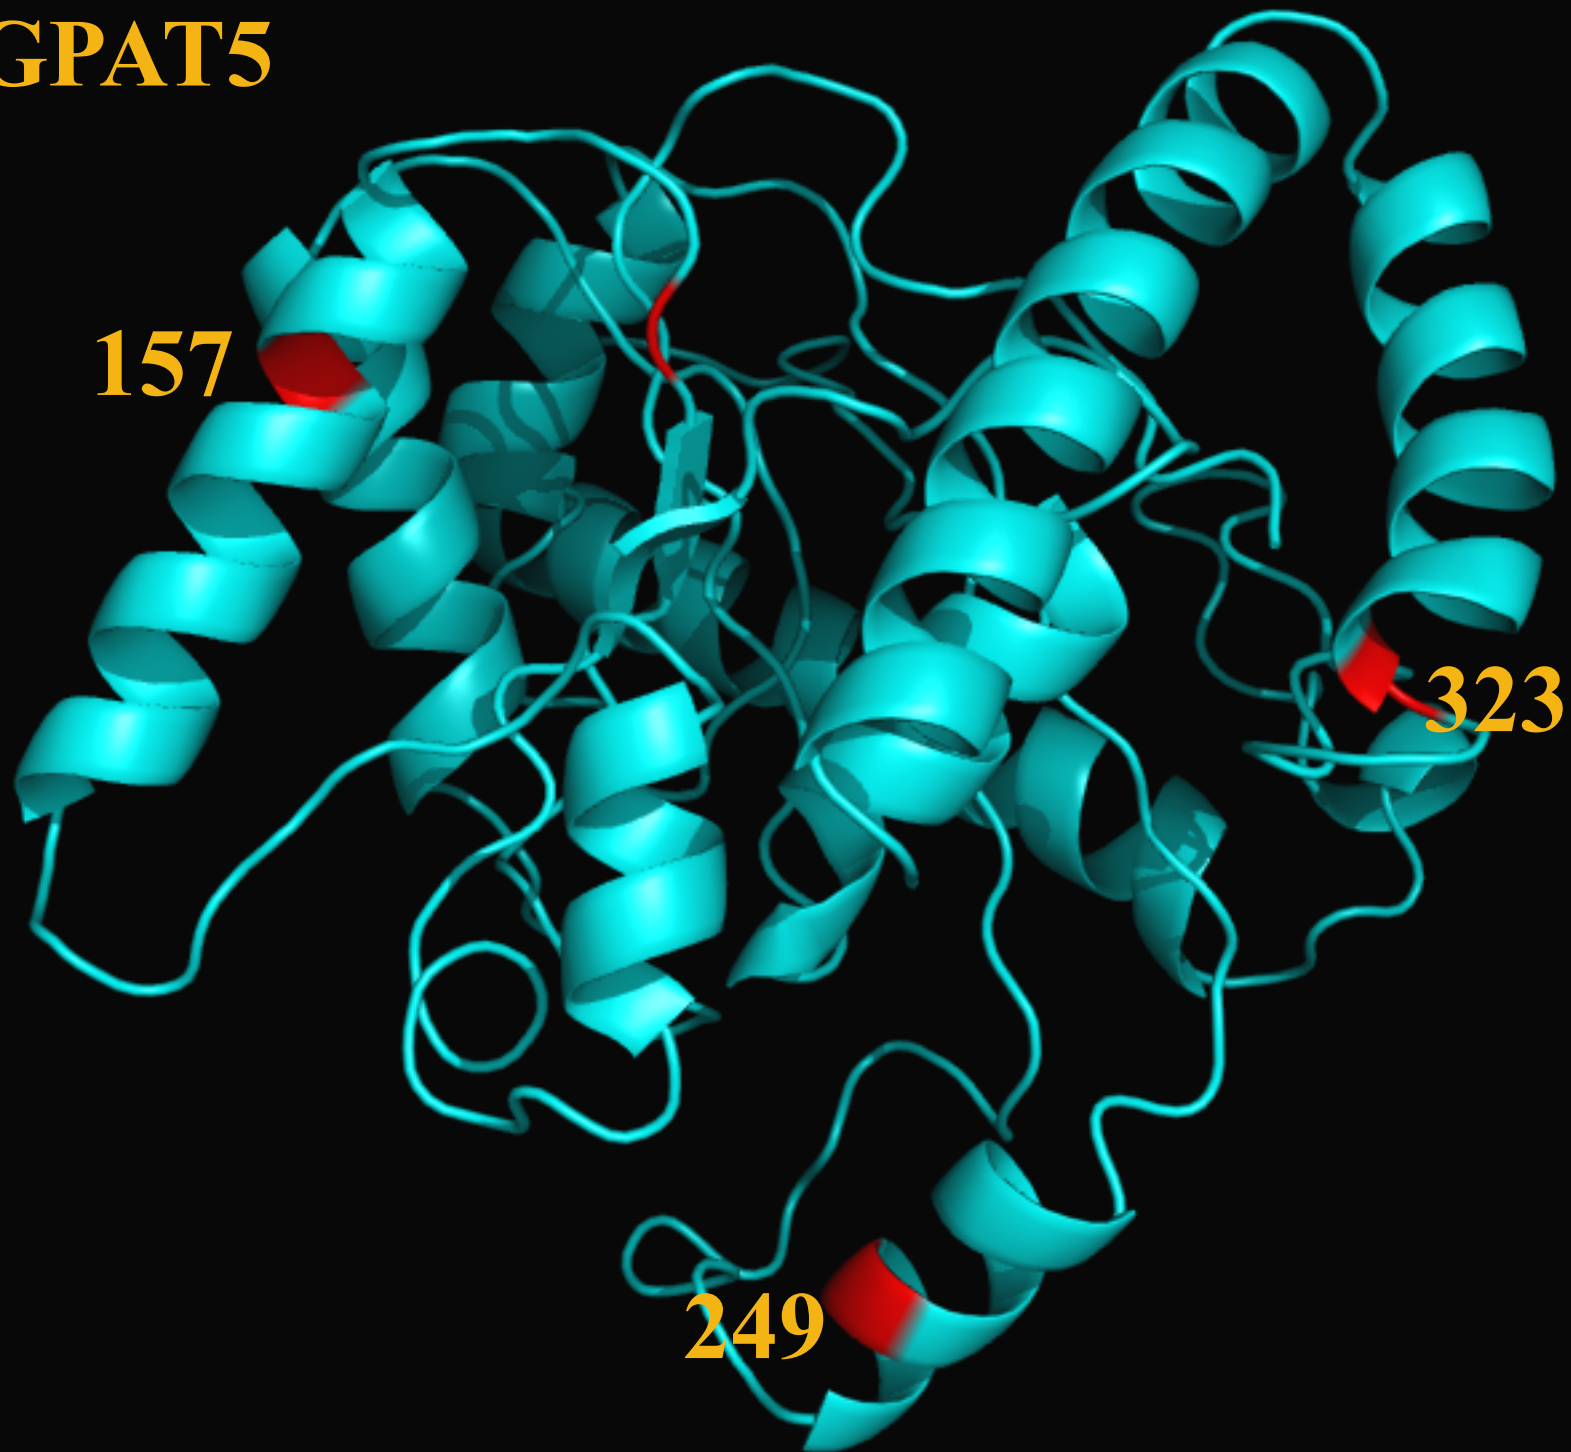



**CIDEA**

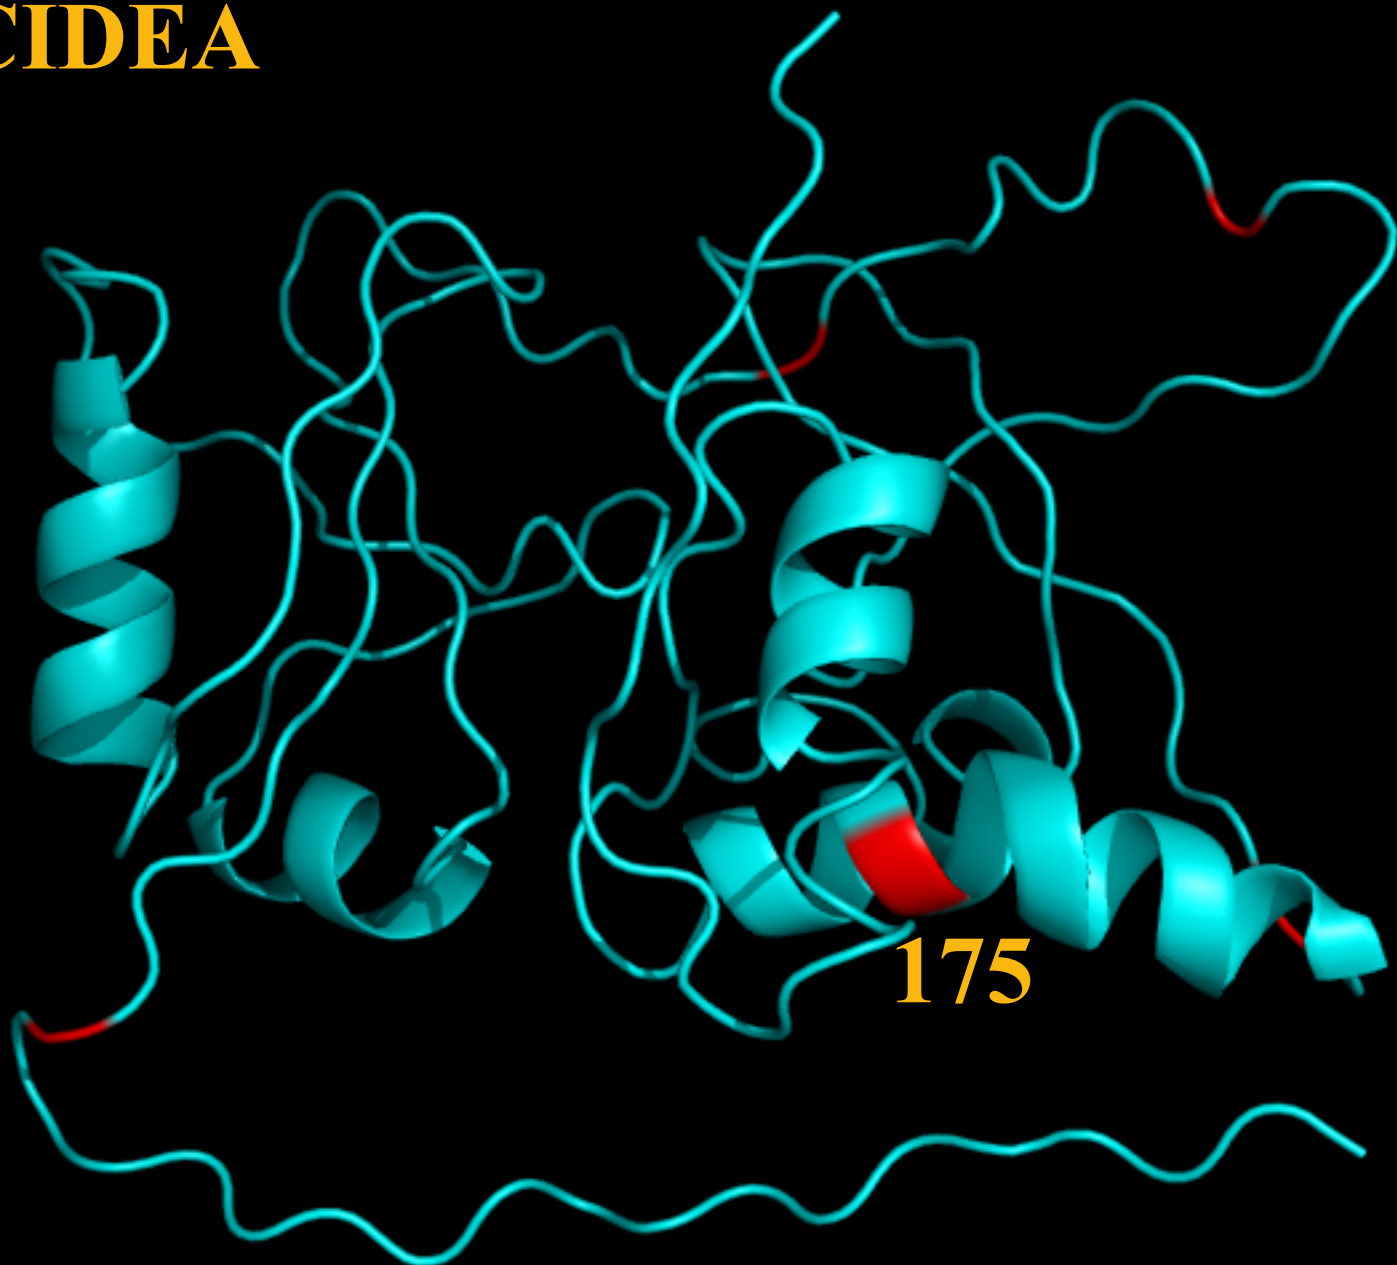

**175**

# DGAT2

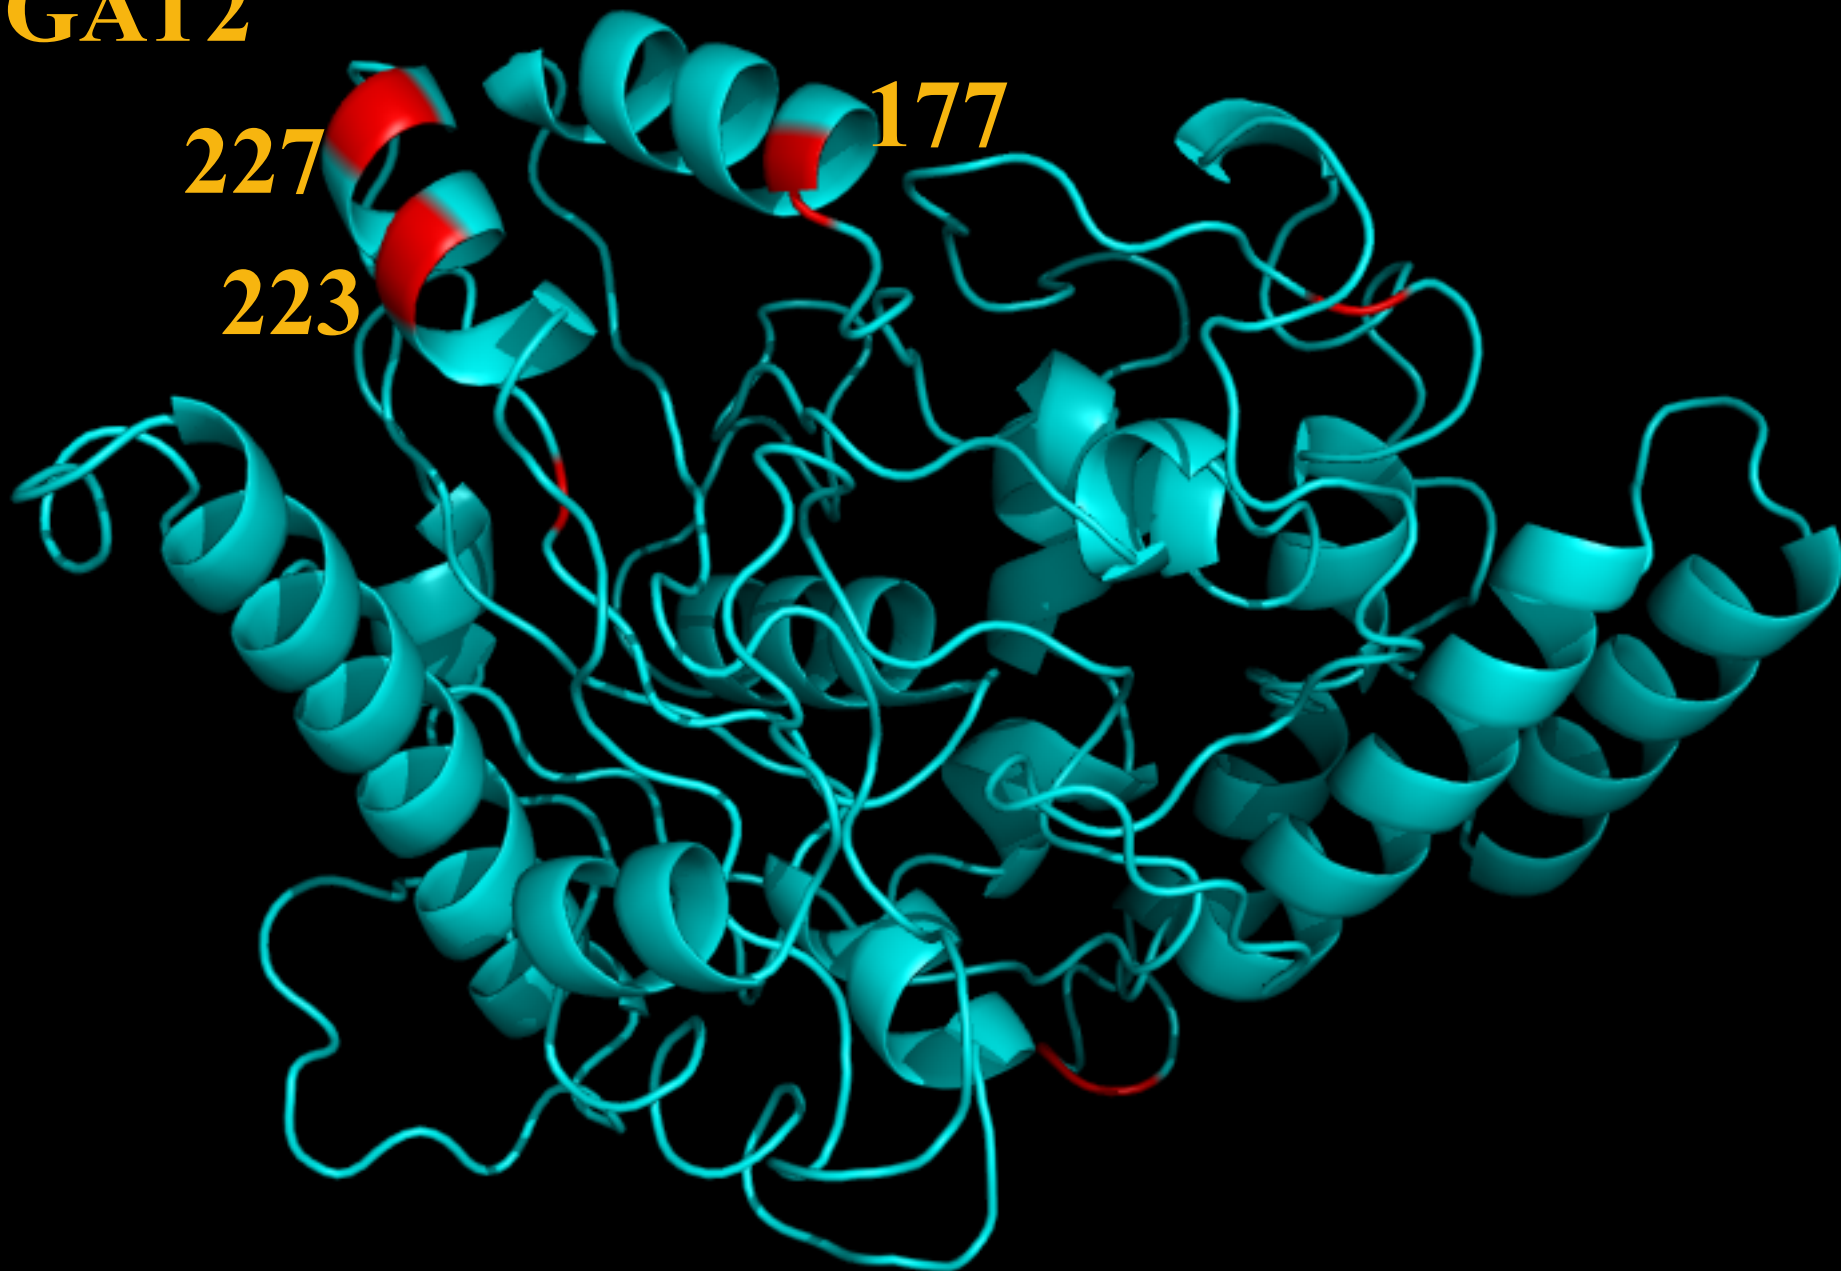

**DGKG**

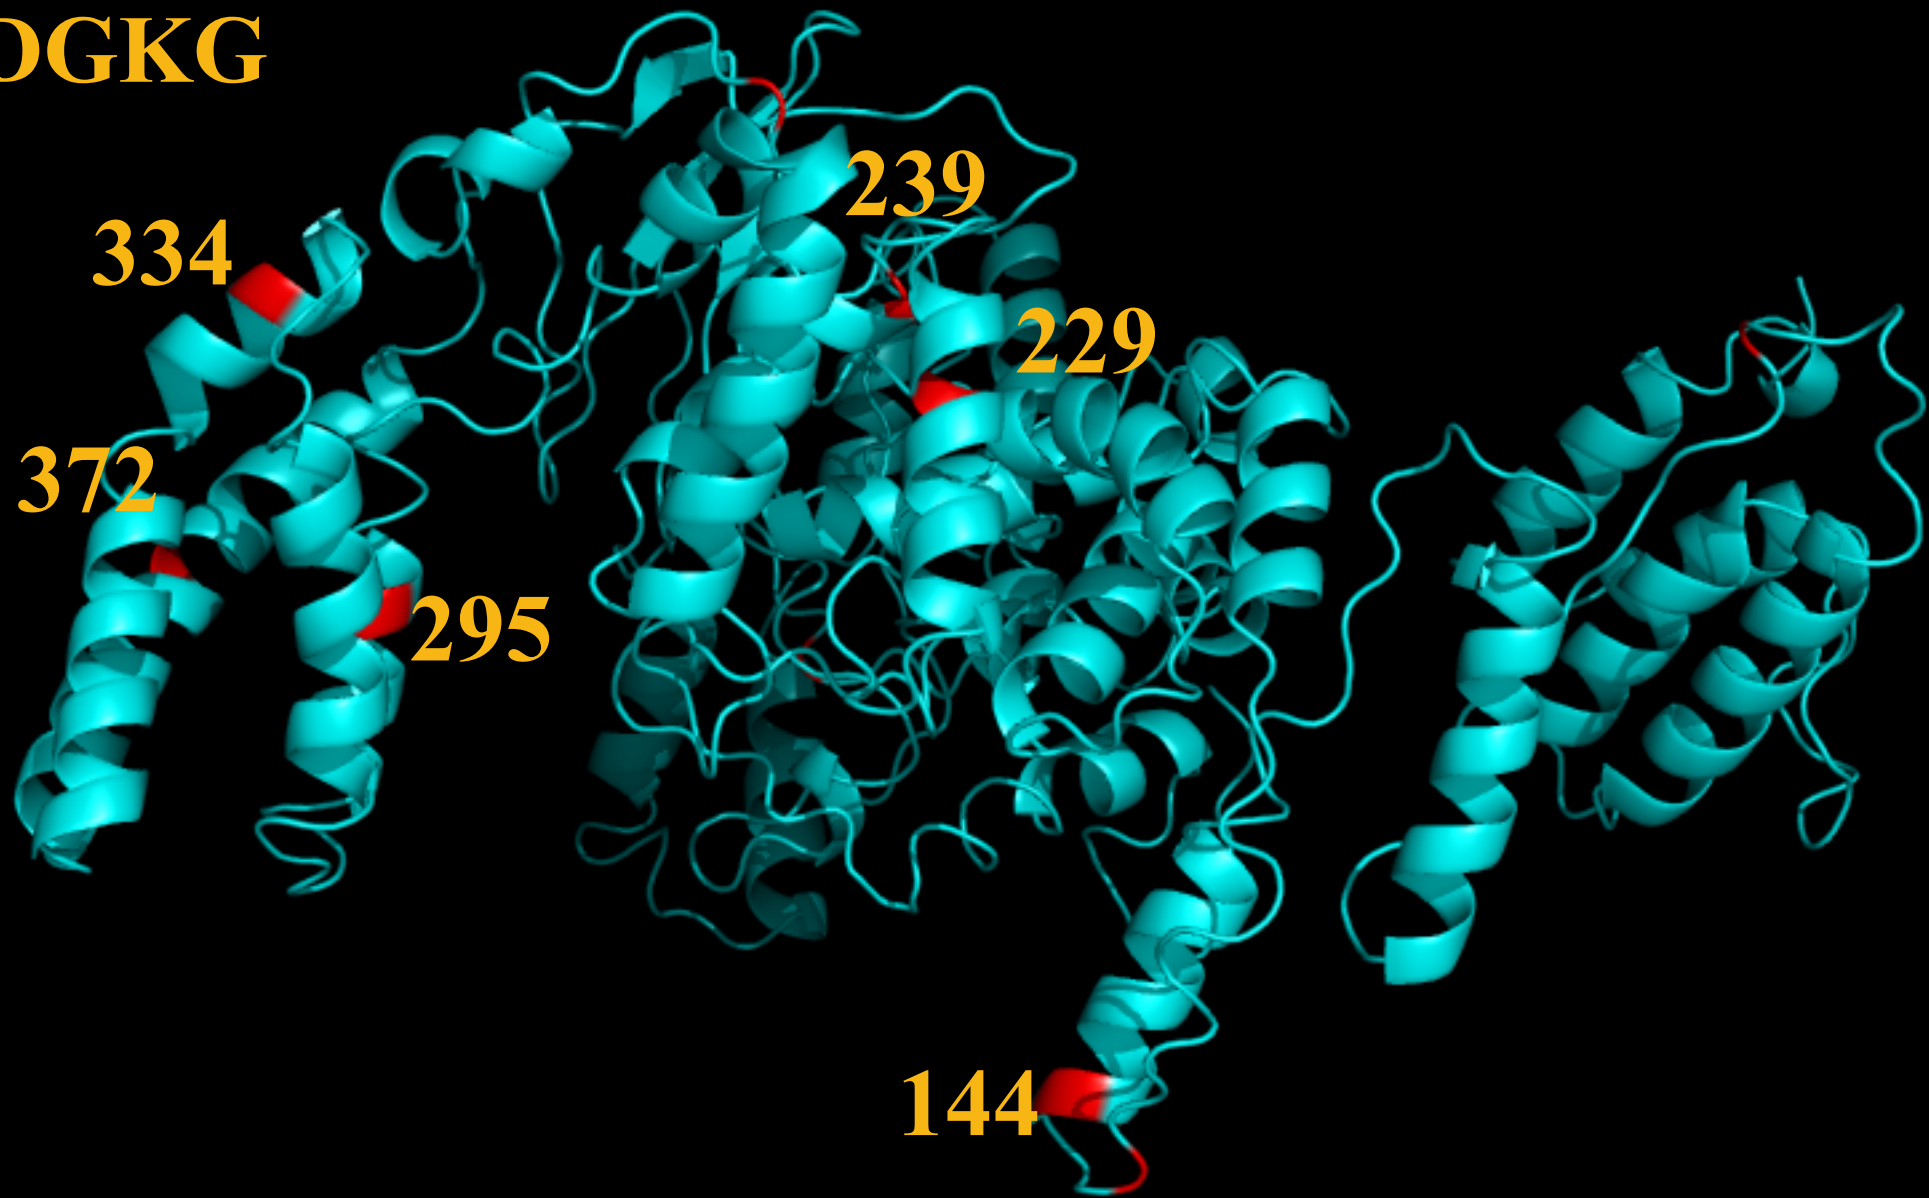

# FABP4

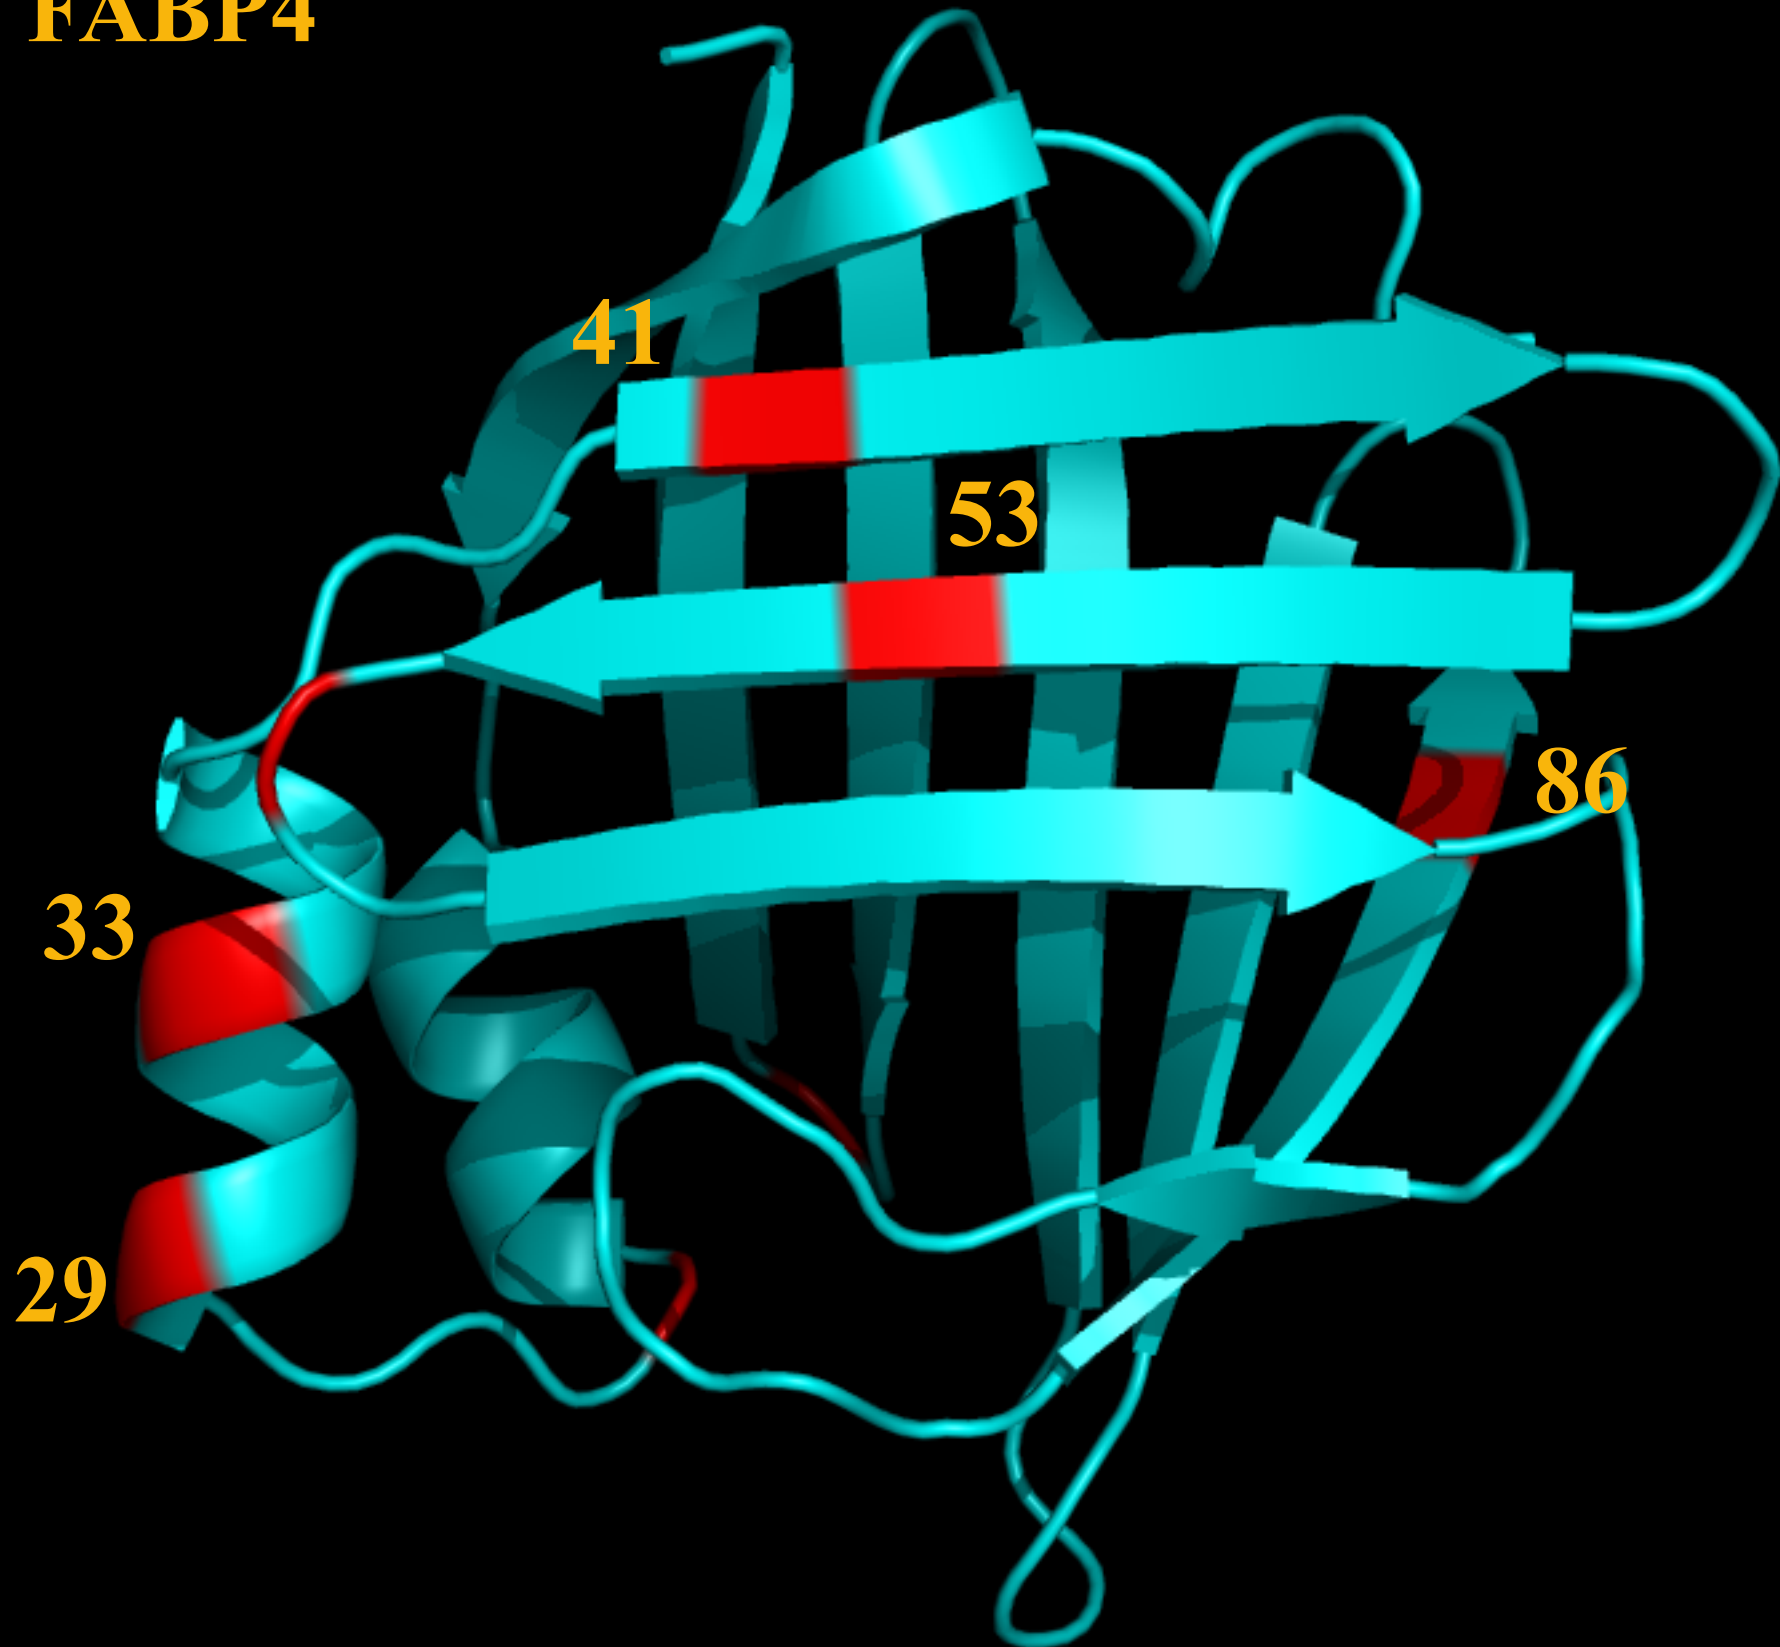

# FATP2

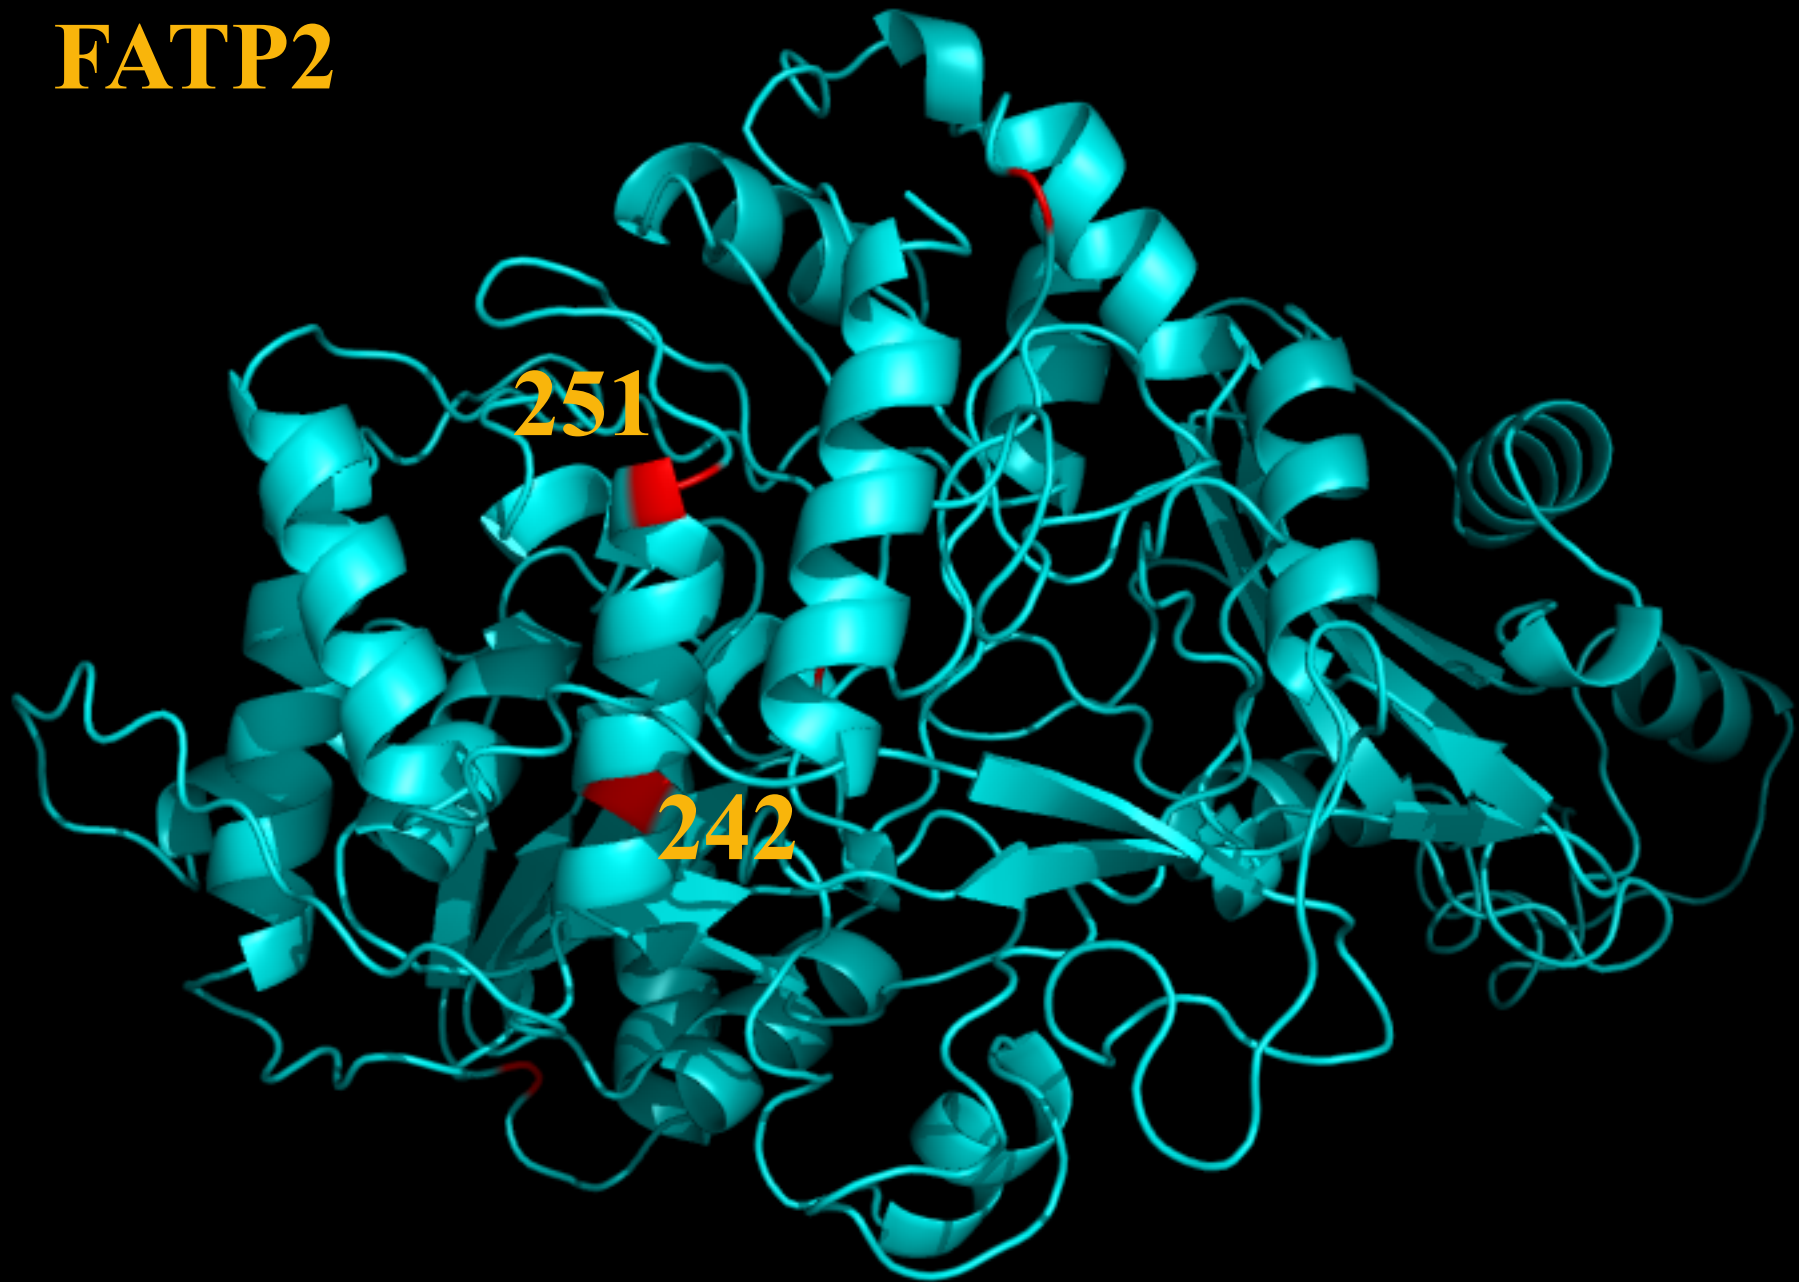

# GPAT2

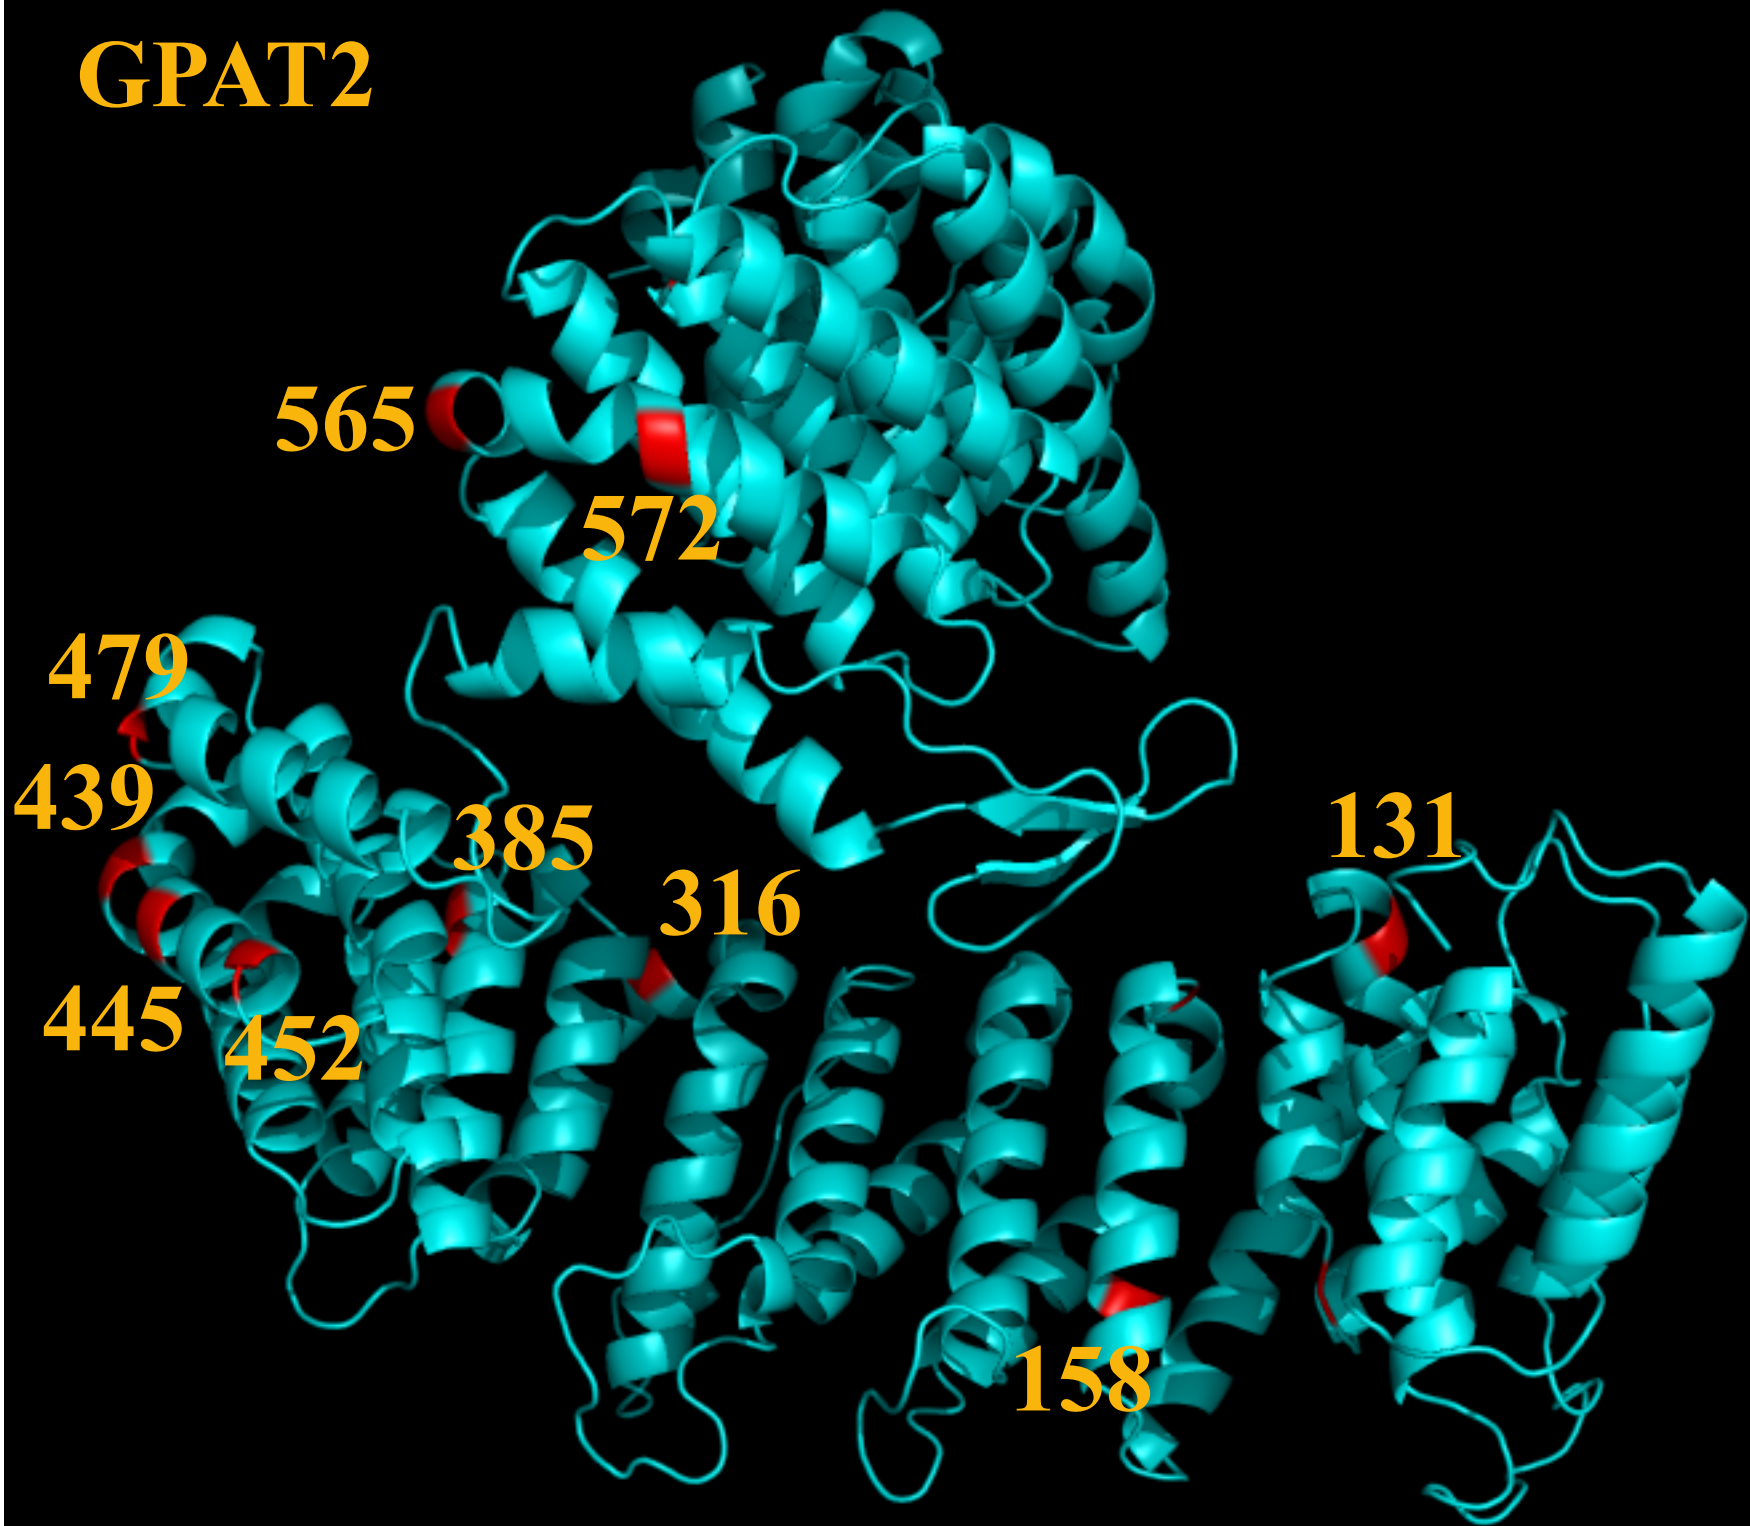

**MGLL**

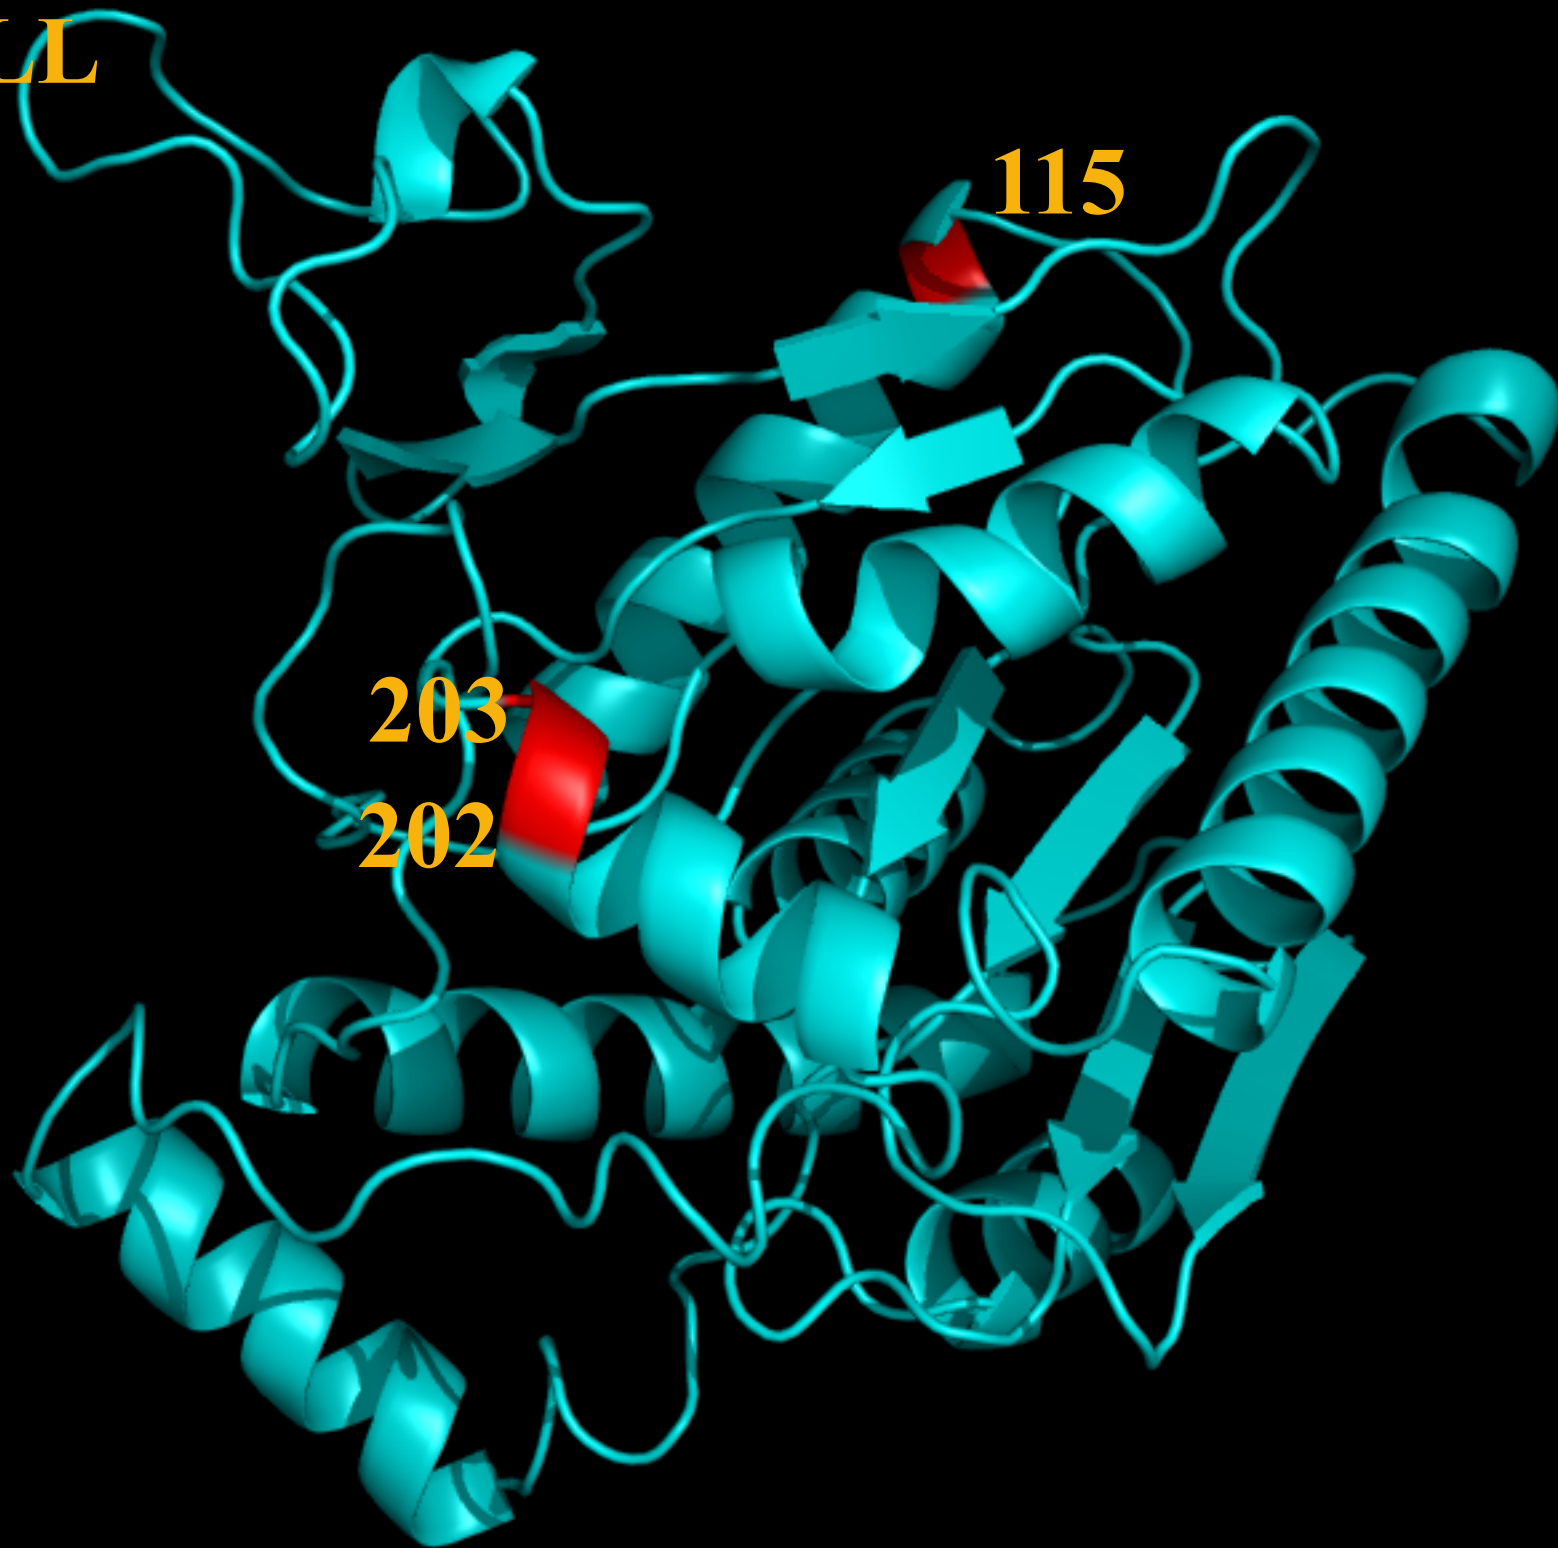

**115**

**203**

**202**

# MOGAT2

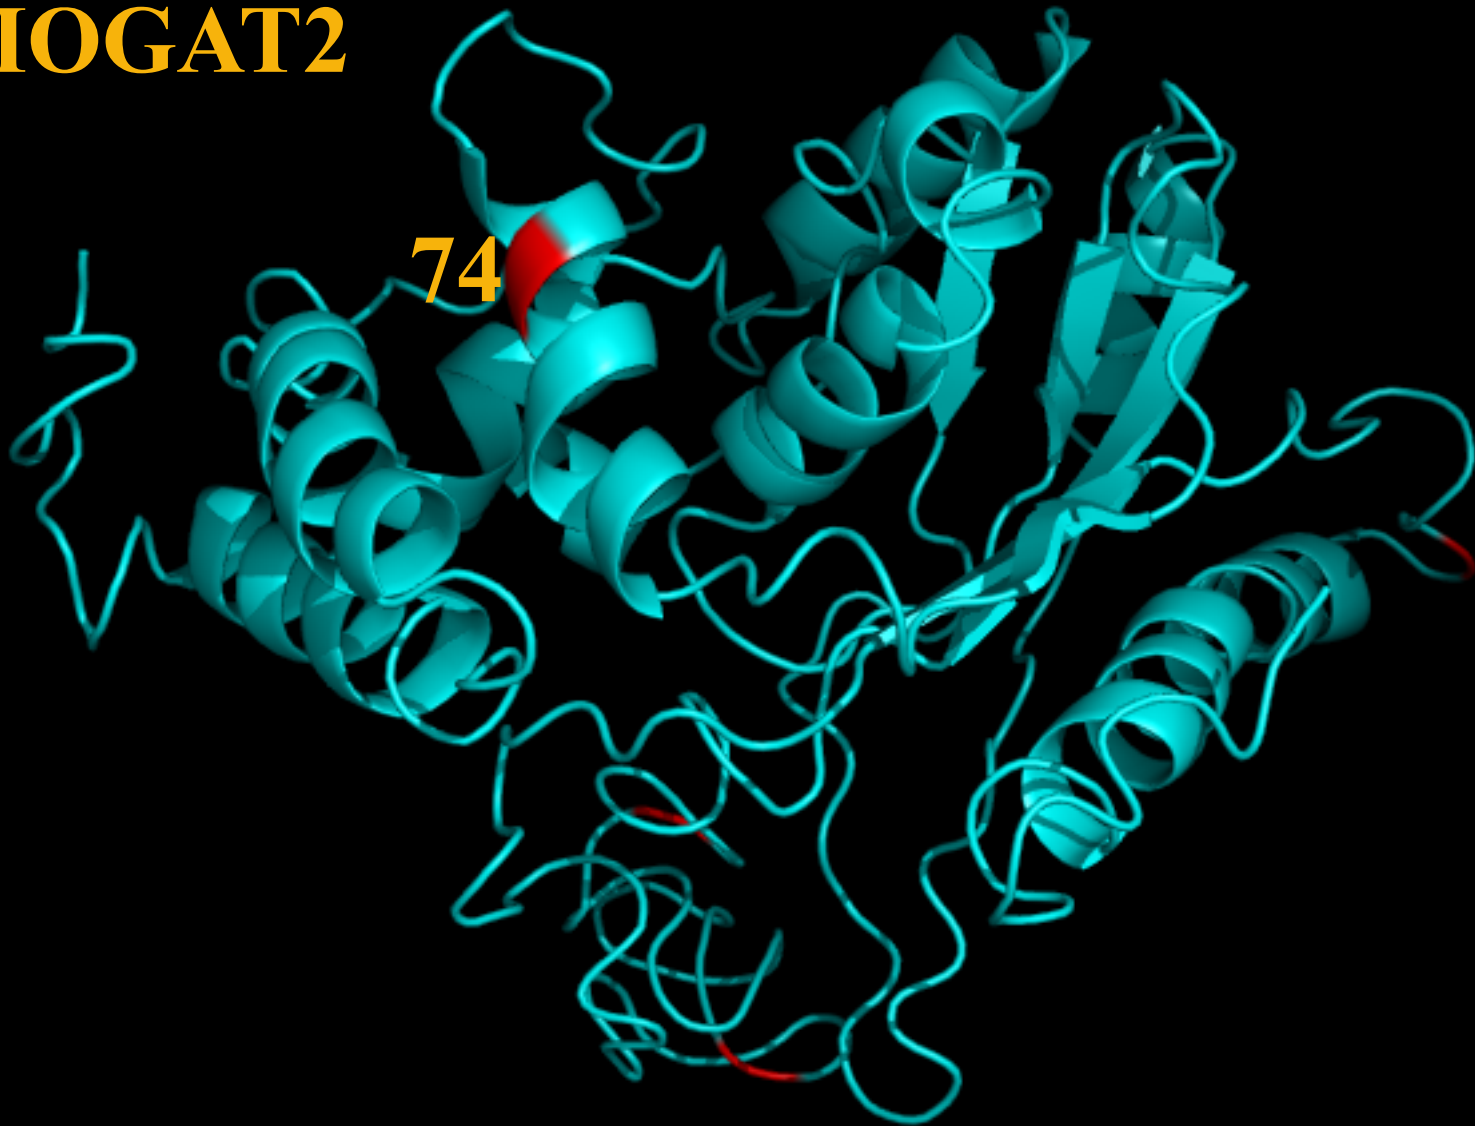



# PDE3B

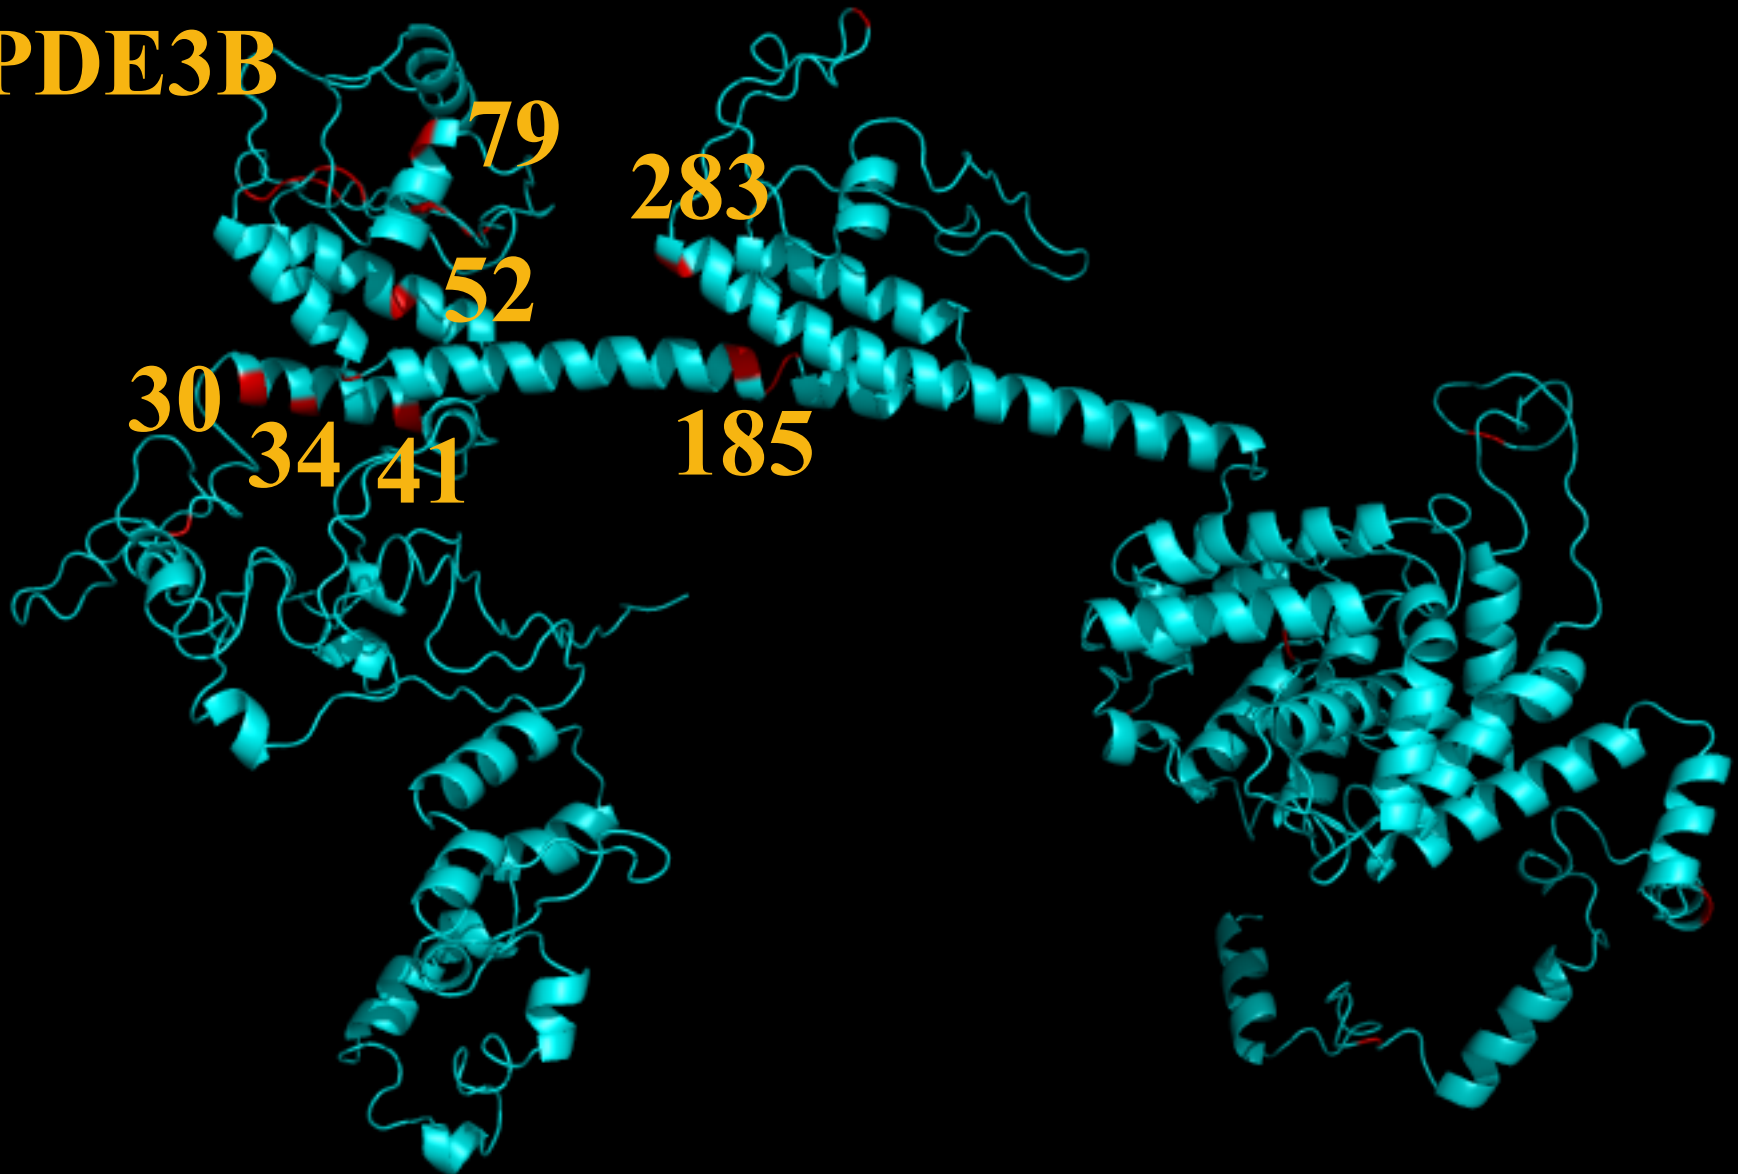

# PLIN1

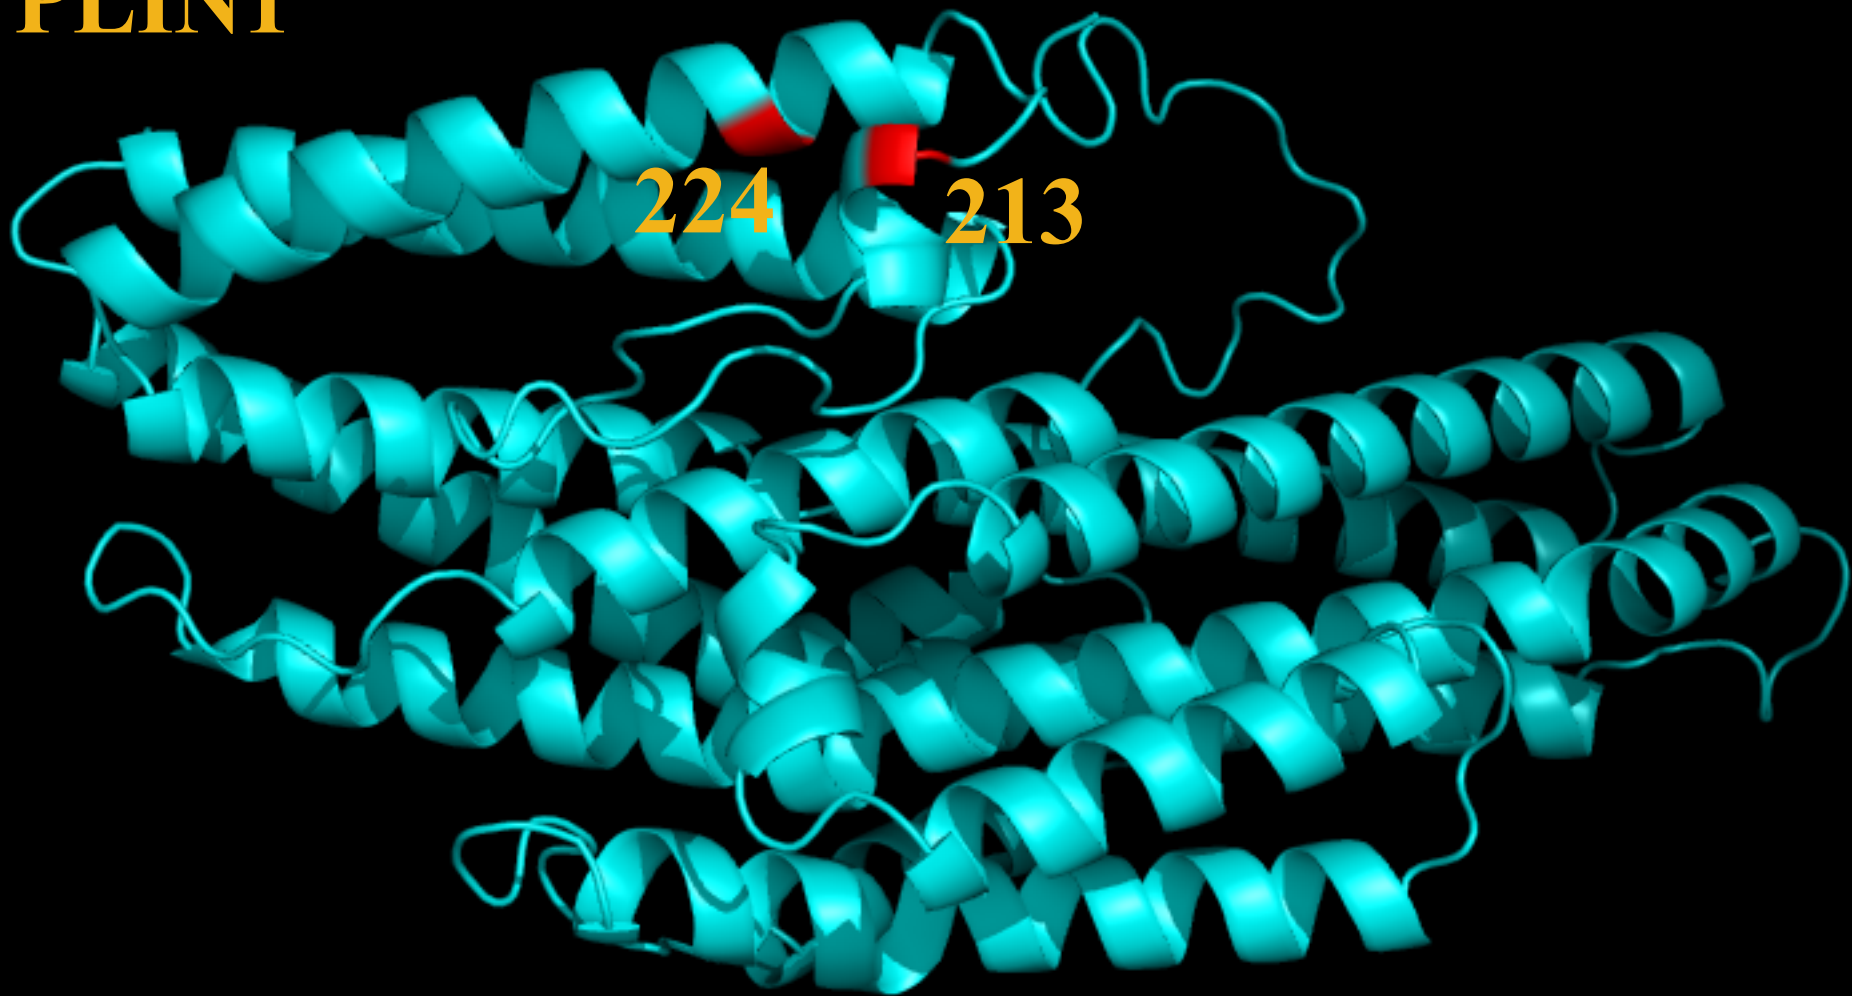

# PNLIP

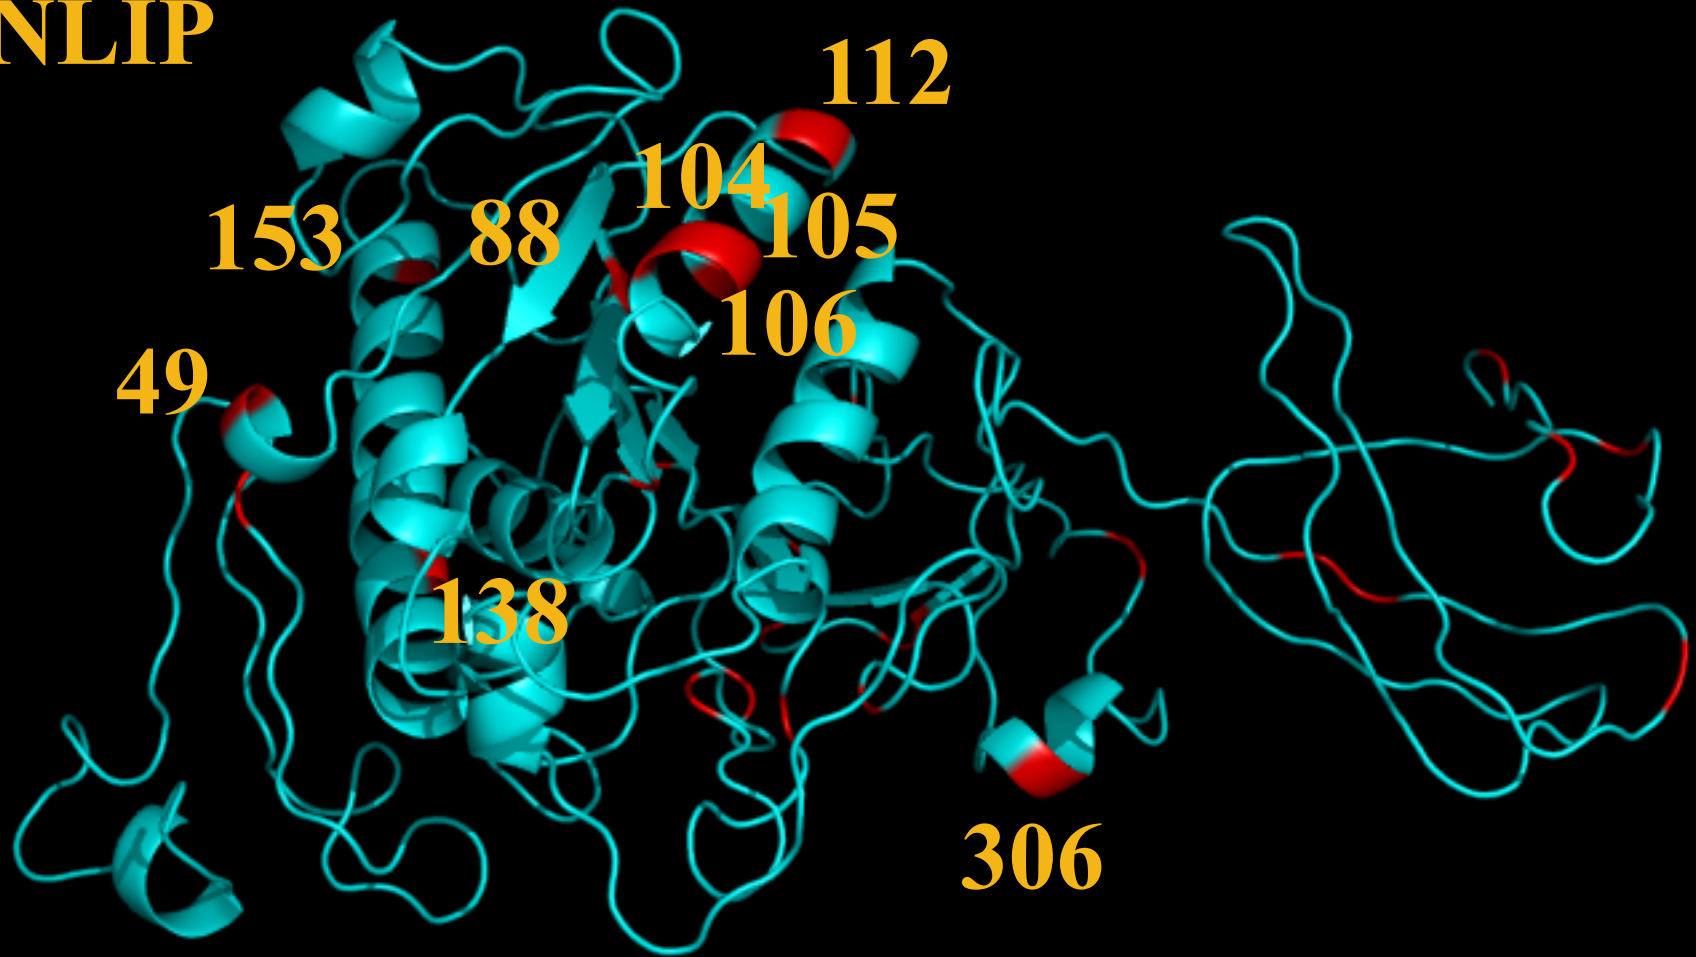

# SREBF2

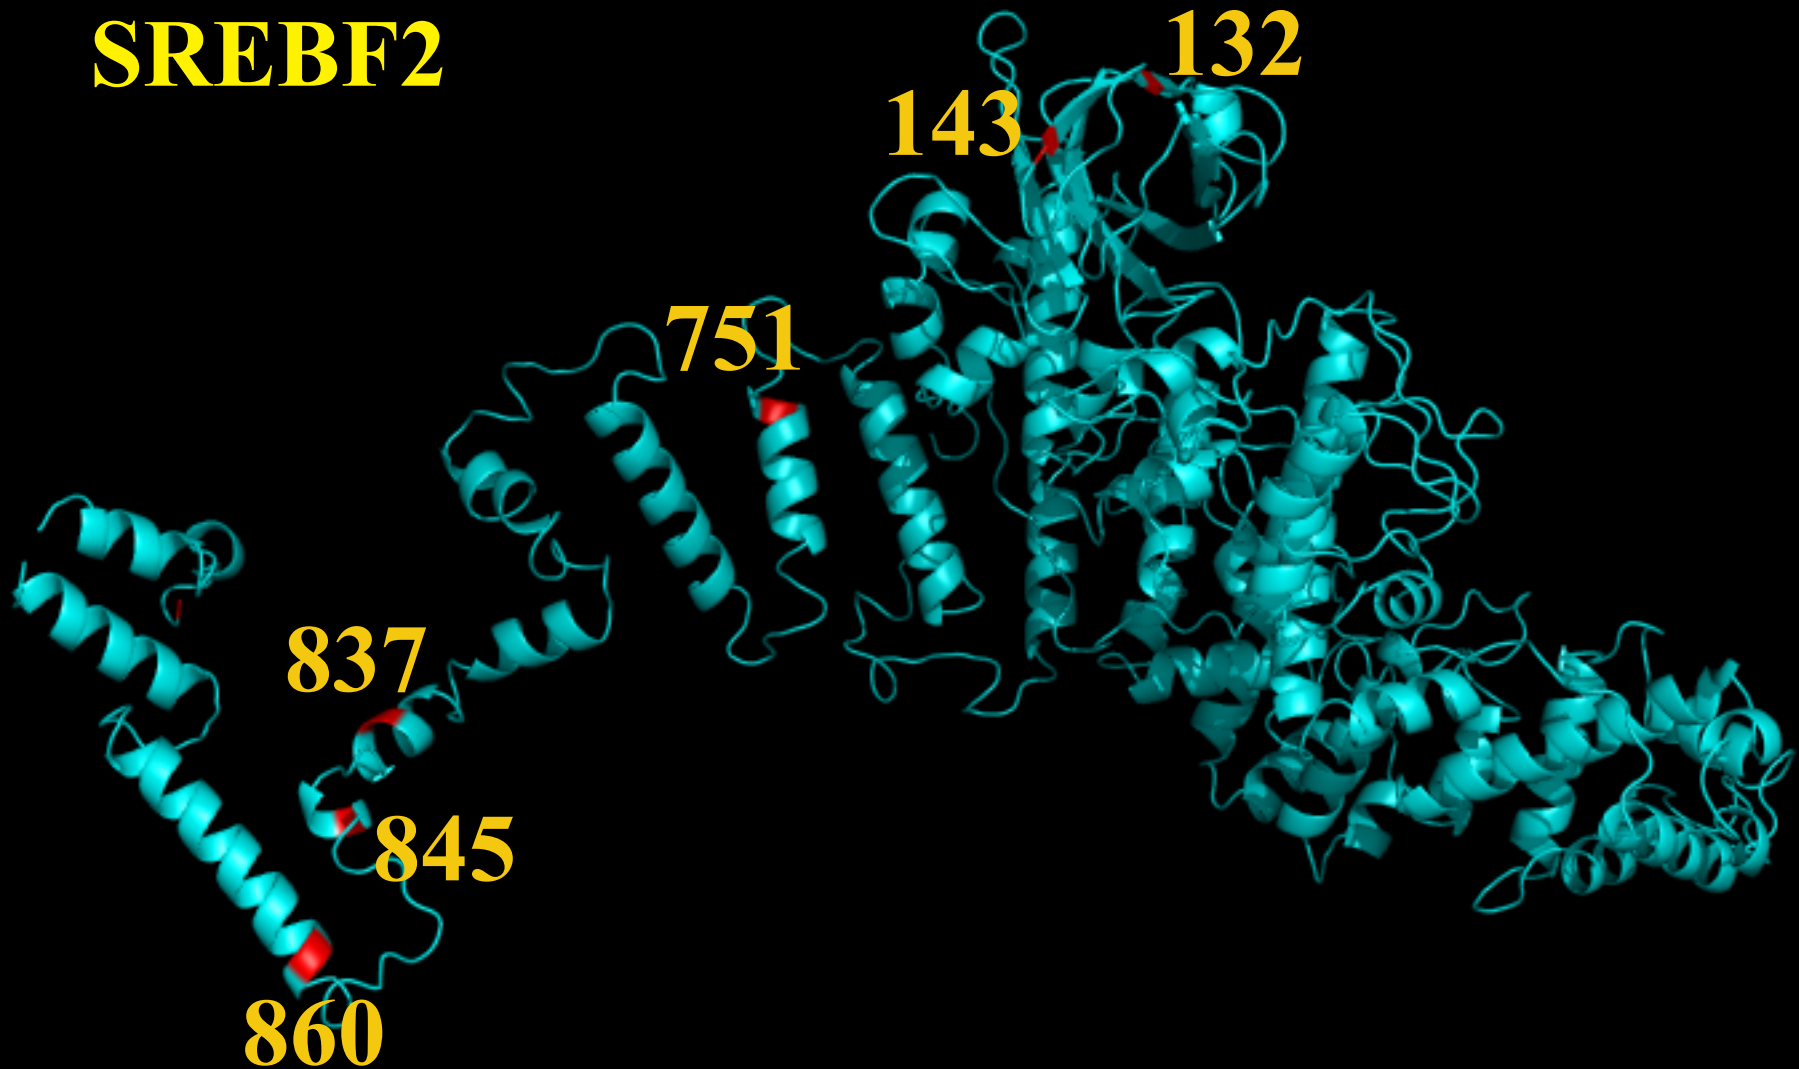

Supplement: srep14187-s1.pdf [file srep14187-s1.pdf]
